1 **WOX9 functions antagonistic to STF and LAM1 to regulate leaf blade expansion in**  
2 ***Medicago truncatula* and *Nicotiana sylvestris***

3

4 Tezera W. Wolabu<sup>a,b</sup>, Hui Wang<sup>a,c</sup>, Dimiru Tadesse<sup>a</sup>, Fei Zhang<sup>a,d</sup>, Marjan Behzadirad<sup>a</sup>  
5 Varvara E. Tvorogova<sup>a,e</sup>, Haggagi Abdelmageed<sup>a,f</sup>, Ye Liu<sup>g</sup>, Naichong Chen<sup>a,h</sup>, Jianghua  
6 Chen<sup>i</sup>, Randy D. Allen<sup>a,h</sup>, and Million Tadege<sup>a,j1</sup>

7

8 <sup>a</sup>Institute for Agricultural Biosciences, Oklahoma State University, Ardmore, OK 73401,  
9 USA.

10 <sup>b</sup>Noble Research Institute, LLC, Ardmore, OK 73401, USA.

11 <sup>c</sup>College of Grassland Science and Technology, China Agricultural University, Beijing,  
12 China.

13 <sup>d</sup>Department of Molecular, Cellular and Developmental Biology, Yale University, New  
14 Haven, CT 06520-8104, USA.

15 <sup>e</sup>Department of Genetics and Biotechnology, St. Petersburg State University, St.  
16 Petersburg, Russia.

17 <sup>f</sup>Department of Agricultural Botany, Faculty of Agriculture, Cairo University, Giza  
18 12613, Egypt

19 <sup>g</sup>School of Life Science, University of Science and Technology of China, Hefei, Anhui  
20 230027, China

21 <sup>h</sup>Department of Biochemistry and Molecular Biology, Oklahoma State University,  
22 Stillwater, OK, USA

23 <sup>i</sup>CAS Key Laboratory of Topical Plant Resources and Sustainable Use, CAS Center for  
24 Excellence in Molecular Plant Sciences, Xishuangbanna Tropical Botanical Garden,  
25 Chinese Academy of Sciences, Kunming, Yunnan 650223, China.

26 <sup>j</sup>Department of Plant and Soil Sciences, Oklahoma State University, Stillwater, OK, USA  
27

28 <sup>1</sup>To whom correspondence should be addressed. Email: [million.tadege@okstate.edu](mailto:million.tadege@okstate.edu).

29

30 **Running Title:** WOX9 negatively regulates leaf blade outgrowth

31

32 **One sentence summary:**

33 WOX9 negatively regulates blade outgrowth antagonizing STF function but directly  
34 repressed by STF indicating WOX-mediated homeostasis in cell proliferation and  
35 differentiation during leaf morphogenesis.

36

37 **Corresponding author:**

38 Million Tadege

39 Institute for Agricultural Biosciences, Oklahoma State University.

40 3210 Sam Noble Parkway, Ardmore, OK 73401, U.S.A

41 Tel: 580-224-0629.

42 Fax: 580-224-0624

43 Email: [million.tadege@okstate.edu](mailto:million.tadege@okstate.edu)

44 The author responsible for distribution of materials integral to the findings presented in  
45 this article in accordance with the policy described in the Instructions for Authors  
46 ([www.plantcell.org](http://www.plantcell.org)) is: Million Tadege ([million.tadege@okstate.edu](mailto:million.tadege@okstate.edu)).

47

## 48 **Abstract**

49 Plant specific WOX family transcription factors are known to regulate embryogenesis,  
50 meristem maintenance and lateral organ development. Modern clade WOX genes  
51 function through a transcriptional repression mechanism, and the intermediate clade  
52 transcriptional activator WOX9 functions with the repressor WOX genes in  
53 embryogenesis and meristems maintenance, but the mechanism of this interaction is  
54 unclear. *WOX1* homologues *STF* and *LAM1* are required for leaf blade outgrowth in  
55 *Medicago truncatula* and *Nicotiana Sylvestris*, respectively. Here we show that *WOX9*  
56 negatively regulates leaf blade outgrowth and functions antagonistically to *STF* and  
57 *LAM1*. While *NsWOX9* ectopic expression enhances the *lam1* mutant phenotype, and  
58 antisense expression partially rescues the *lam1* mutant, both overexpression of *NsWOX9*  
59 and knockout by CRISPR/Cas9 genome editing in *N. sylvestris* resulted in a range of  
60 severe leaf blade distortions, indicating that controlled negative regulation by *NsWOX9*  
61 is required for proper blade development. Our results indicate that direct repression of  
62 *WOX9* transcriptional activation activity by the transcriptional repressor *STF/LAM1* is  
63 required for correct blade architecture and patterning in *M. truncatula* and *N. sylvestris*.  
64 These findings suggest that a balance between transcriptional activation and repression  
65 mechanisms by direct interaction of activator and repressor WOX genes may be required  
66 for cell proliferation and differentiation homeostasis, and could be an evolutionarily  
67 conserved mechanism for the development of complex and diverse morphology in higher  
68 plants.

69

## 70 **Introduction**

71 WUSCHEL-related homeobox (WOX) factors are plant-specific transcriptional regulator  
72 proteins that contain a DNA binding homeodomain similar to WUSCHEL (WUS), the  
73 founding member of the family from Arabidopsis. Several elegant studies demonstrated  
74 that the WOX family is involved in the regulation of a wide range of key developmental  
75 programs ranging from the modulation of zygotic development and embryogenesis by  
76 *WOX2*, *WOX8*, and *WOX9* (Haecker et al., 2004; Breuninger et al., 2008; Ueda et al.,  
77 2011) to maintenance of shoot and root apical meristems orchestrated by *WUS* and  
78 *WOX5*, respectively (Mayer et al., 1998; Sarkar, 2007), along with several other

79 developmental pathways (Matsumoto and Okada, 2001; Park et al., 2005; Deyhle et al.,  
80 2007; Shimizu et al., 2009; Vandebussche et al., 2009; Hirakawa et al., 2010; Ji et al.,  
81 2010; Tadege et al., 2011b; Nakata et al., 2012).

82 *WUS* and its homologues in other species, including *TERMINATOR* (*TER*) in  
83 petunia, *ROSULATA* (*ROA*) in *Antirrhinum*, and *HEADLESS* (*HDL*) in *Medicago*, are  
84 required for shoot apical meristem (SAM) maintenance (Laux et al., 1996; Mayer et al.,  
85 1998; Stuurman et al., 2002; Kieffer et al., 2006; Meng et al., 2019; Wang H, 2019). Loss  
86 of *WUS* function in the *wus-1* *Arabidopsis* mutant results in premature termination and  
87 arrest of the SAM and floral meristem, but the SAM re-establishes itself to resume  
88 growth while the process repeats itself, leading to altered plant morphology (Laux et al.,  
89 1996; Mayer et al., 1998). In the *hdl* mutant of *M. truncatula*, termination of SAM and  
90 axillary meristems is permanent. Since the SAM fails to re-establish itself, these plants  
91 only make leaves throughout development (Tadege et al., 2015; Meng et al., 2019; Wang  
92 H, 2019). The *hdl* mutant also shows altered leaf shape (Meng et al., 2019; Wang et al.,  
93 2019), which was not detected in the *wus* mutant. However, the *wus wox1 prs* triple  
94 mutant showed a stronger leaf phenotype than the *wox1 prs* double mutant (Zhang F,  
95 2015), suggesting that *WUS* may also have a redundant function in leaf development.  
96 Although *WUS* transcript is specifically expressed in the organizing center (OC) of the  
97 SAM (Mayer et al., 1998), it is likely that a non-cell autonomous signal from *WUS* may  
98 contribute to blade outgrowth, since the *WUS* protein itself is shown to move from the  
99 OC to the stem cell region (Yadav et al., 2011; Daum et al., 2014).

100 An intimate connection exists between *WUS* and the phytohormone cytokinin,  
101 and this appears to be true with some other *WOX* orthologs (Tadege and Mysore, 2011;  
102 Tadege, 2016; Wang, 2017). While *WUS* activity is modulated by cytokinin in the SAM  
103 and axillary meristem (Wang et al., 2017; Snipes et al., 2018), *WUS* promotes cytokinin  
104 activity in the shoot stem cell niche by repressing type-A *ARABIDOPSIS RESPONSE*  
105 *REGULATOR* (*ARR*) genes *ARR5*, *ARR6*, *ARR7*, and *ARR15* (Leibfried et al., 2005) to  
106 activate cell proliferation, and *WUS* physically interacts with the transcriptional co-  
107 repressor *TOPLESS* (*TPL*) to repress target genes that promote cell differentiation  
108 (Kieffer et al., 2006; Causier et al., 2012; Yadav et al., 2013). Genes that encode polarity  
109 factors which impart adaxial or abaxial identity and maintenance of a differentiated state

110 to the leaf blade tissues are among the targets directly repressed by WUS (Yadav et al.,  
111 2013). This uncovers a mechanism by which WUS maintains undifferentiated stem cells  
112 in the SAM, in addition to the well-established CLE peptide signaling (Schoof et al.,  
113 2000; Somssich et al., 2016; Hu C, 2018). Although WUS is reported to be a bifunctional  
114 transcription factor exhibiting both transcriptional repression and activation activities  
115 (Ikeda et al., 2009), its SAM maintenance activity and interaction with cytokinin are  
116 shown to be linked to its WUS box (Ikeda et al., 2009; Dolzblasz et al., 2016; Snipes et  
117 al., 2018), suggesting that WUS primarily functions as a transcriptional repressor.  
118 Interestingly, *WUS* is reported to be activated by *WOX9/STIP*, which is also required for  
119 shoot meristem maintenance (Wu et al., 2005) and embryo development (Wu et al., 2007;  
120 Ueda et al., 2011). However, *WOX9* is reported to be a strong transcriptional activator  
121 (Lin et al., 2013), and it is unclear whether *WUS* and *WOX9* employ the same  
122 mechanism in shoot meristem maintenance.

123 The *WOX9* gain-of-function *stip-D* mutant displays wavy leaf margins indicating  
124 problems with cell division in leaf primordium (Wu et al., 2005). But, the *stip* loss-of-  
125 function mutant is arrested at the seedling stage (Wu et al., 2005), and it is unclear if  
126 *WOX9/STIP* plays a specific role in leaf blade development. However, *WOX* function in  
127 leaf development is not uncommon in *Arabidopsis* and several other species. *WOX1* and  
128 *PRS/WOX3* in *Arabidopsis* (Vandenbussche et al., 2009; Nakata et al., 2012) and their  
129 homologues in maize, rice, petunia, *Medicago* and woodland tobacco regulate leaf blade  
130 development (Nardmann et al., 2004; Vandenbussche et al., 2009; Tadege et al., 2011b;  
131 Zhuang et al., 2012; Cho et al., 2013; Ishiwata et al., 2013). Unlike leaf polarity factors  
132 that are adaxial or abaxial-specific (Waites et al., 1998; Sawa, 1999; Siegfried, 1999;  
133 Kerstetter et al., 2001; McConnell et al., 2001; Iwakawa et al., 2002), the *WOX* genes  
134 *STF*, *WOX1* and *PRS*, are expressed in the middle at the adaxial-abaxial juxtaposition to  
135 control medial-lateral outgrowth of the leaf blade (Tadege et al., 2011a,b; Nakata and  
136 Okada, 2012; Nakata et al., 2012), suggesting a novel mechanism for blade expansion.

137 *M. truncatula* *STF* or *N. sylvestris* *LAM1* is a transcriptional repressor (Lin, 2013;  
138 Lin et al., 2013) and its repression activity is conferred by its WUS box and STF box  
139 motifs (Zhang et al., 2014; Zhang and Tadege, 2015). The DNA binding STF  
140 homeodomain (HD) and the repression motifs (WUS box and STF box) are critically

141 required for blade outgrowth function (Lin et al., 2013; Zhang et al., 2014; Zhang et al.,  
142 2019). Interestingly, all of the WUS clade Arabidopsis WOX transcription factors (WUS  
143 and WOX1-WOX7), which have transcriptional repression activity, can substitute for  
144 LAM1 function (Lin et al., 2013), suggesting that modern/WUS clade WOX members  
145 have a conserved transcriptional repression mechanism in meristem maintenance and  
146 lateral organ development, with specificity conferred by cis elements that drive specific  
147 expression patterns.

148 Intermediate clade WOX members have intact HD but lack repression domains.  
149 Here we show that homologues of the intermediate clade transcriptional activator WOX9,  
150 namely, MtWOX9-1, MtWOX9-2, and NsWOX9, negatively regulate leaf blade  
151 outgrowth in *M. truncatula* and *N. sylvestris*. These factors function antagonistically to  
152 STF or LAM1, and exacerbate the *lam1* phenotype. Suppression of *NsWOX9* transcript  
153 levels by antisense technology partially rescues the *lam1* mutant leaf blade while the  
154 introduction of knockout mutations in the native *NsWOX9* gene by multiplex gRNA  
155 genome editing severely affected leaf blade symmetry and expansion. Our results suggest  
156 that direct and antagonistic interactions between transcriptional repressor and activator  
157 WOX genes may be important to balance cell proliferation with differentiation in  
158 acquiring complex morphology in higher plants.

159

160

161 **Results**

162 **Ectopic expression of *WOX9* enhances *stf* and *lam1* mutant phenotypes.**

163 We have previously shown that, while the WUS clade repressor *WOX* genes of  
164 Arabidopsis including *WUS* and *WOX1-WOX7* complement the *lam1* mutant phenotype  
165 when driven by the *STF* promoter, the intermediate clade *WOX9* expression exacerbates  
166 the *lam1* mutant phenotype (Lin et al., 2013). Therefore, we decided to investigate  
167 whether the unique activity of *WOX9* is conserved in *Medicago truncatula* and *Nicotiana*  
168 *sylvestris* and determine its biological significance in leaf development. We isolated  
169 orthologous coding sequences for *AtWOX9* from *M. truncatula* (*MtWOX9*) and *N.*  
170 *sylvestris* (*NsWOX9*) and created expression constructs that placed these sequences under  
171 control of the *STF* promoter to ectopically express these genes in the *stf* and *lam1* mutant  
172 plants. *stf* and *lam1* are severe leaf blade mutants in *M. truncatula* and *N. sylvestris*,  
173 respectively, caused by mutation of the *WOX1* orthologs *STF* and *LAMI* (Figures 1B and  
174 1E). The *M. truncatula* genome contains two *WOX9*-like sequences here designated as  
175 *MtWOX9-1* and *MtWOX9-2* (Figure S1 and S2). We introduced *MtWOX9-1* driven by the  
176 *STF* promoter (*STF::MtWOX9-1*) first into the *stf* *M. truncatula* plants and eight  
177 independent transgenic lines were generated. Expression of *MtWOX9-1* in the *stf* mutant  
178 background was confirmed by RT-PCR assays. All of these transgenic lines displayed  
179 strongly enhanced mutant phenotype with much narrower leaves and thinner stems  
180 compared to the *stf* mutant (Figures 1A to 1C). In addition, leaves and stems were  
181 significantly shorter in length, leading to a dwarf phenotype that was not characteristic of  
182 the *stf* mutant phenotype (Figures 1B and 1C). Similarly, introduction of this construct  
183 into the *lam1* mutant background severely affected both leaf length and width,  
184 exacerbating the *lam1* mutant phenotype (Figures 1D to 1F). These results indicate that  
185 both the *stf* and *lam1* mutants respond similarly to the activity of *MtWOX9-1*, consistent  
186 with the effect of *AtWOX9* ectopic expression in the *lam1* mutant (Lin et al., 2013). We  
187 also transformed *35S::MtWOX9-1*, *35S::MtWOX9-2* and *35S::NsWOX9* into the *lam1*  
188 mutant and obtained severely enhanced mutant phenotypes similar to the *STF::MtWOX9-*  
189 *1* expressing *lam1* lines (Figure 1G to 1I), indicating that these three genes have similar  
190 effects on leaf blade outgrowth. In most cases, these transgenic leaves displayed  
191 approximately five-fold reduction in leaf length, but this effect appeared to be dependent

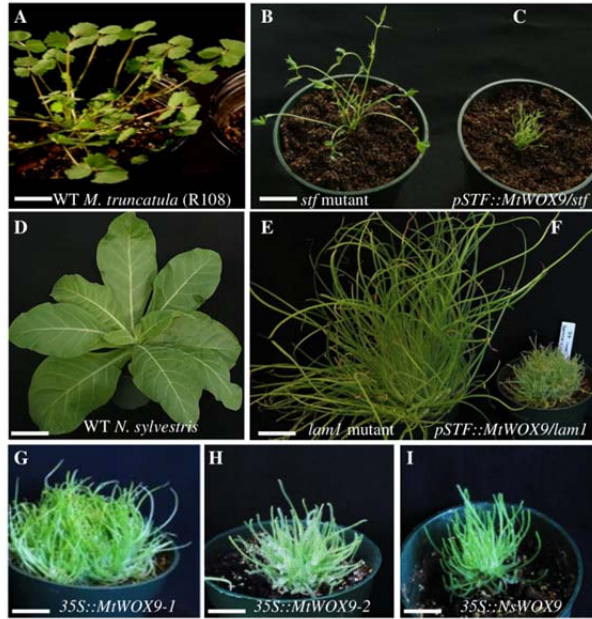

**Figure 1.** Ectopic expression of *WOX9* enhances *stf* and *lam1* mutant phenotypes.

(A) Untransformed *M. truncatula* wild type (WT) (R108) plant. (B) Phenotype of untransformed *stf* mutant. (C) *stf* mutant transformed with *STF::MtWOX9-1*. (D) Untransformed *N. sylvestris* WT plant. (E) Phenotype of untransformed *lam1* mutant. (F) *lam1* mutant transformed with *STF::MtWOX9-1*. (G) *lam1* mutant transformed with *35S::MtWOX9-1*. (H) *lam1* mutant transformed with *35S::MtWOX9-2*. (I) *lam1* mutant transformed with *35S::NsWOX9*. Plants were 10-weeks (E and F) or 5-weeks old (all the rest). Scale bars: 10 cm.

192 on the level of *WOX9* transgene expression since plants with high level of transgene  
193 expression showed more severe phenotypes compared to *lam1* plants with low level of  
194 transgene expression (Supplemental Figure 3).

195 The enhancement of *stf* and *lam1* mutant phenotypes associated with *WOX9*  
196 expression suggested to us that *WOX9* acts in opposition to *STF/LAM1* in leaf blade  
197 development. Therefore, we introduced an *NsWOX9-antisense* construct into the *lam1*  
198 plants to see if reduced levels of *NsWOX9* transcripts could alleviate the mutant  
199 phenotype. Indeed, expression of an *NsWOX9-antisense* construct had the opposite effect  
200 of *NsWOX9* overexpression, partially rescuing the *lam1* mutant leaf phenotype (Figure 2).  
201 However, this partial complementation was limited, and the antisense plants still  
202 appeared bushy and failed to make stems. Nonetheless, unlike the untransformed *lam1*  
203 mutant control, the *NsWOX9-antisense* leaves showed distinct petioles and blades  
204 especially at early stages of development (Figures 2A and 2 B), and the blades were  
205 variously branched and curled resulting in unusual leaf structure at maturity (Figures 2C  
206 to 2E). These leaf phenotypes suggest that blade outgrowth initiation has significantly  
207 progressed in the *NsWOX9-antisense* plants but perhaps aborted before completion.

208 To more completely evaluate the effects altered *WOX9* expression on the *lam1*  
209 mutant phenotype, we carried out structural examination of leaf tissues of WT, *lam1*  
210 mutant, *WOX9* overexpressing *lam1* and *WOX9* antisense *lam1* plants (Figures 3A to 3D).



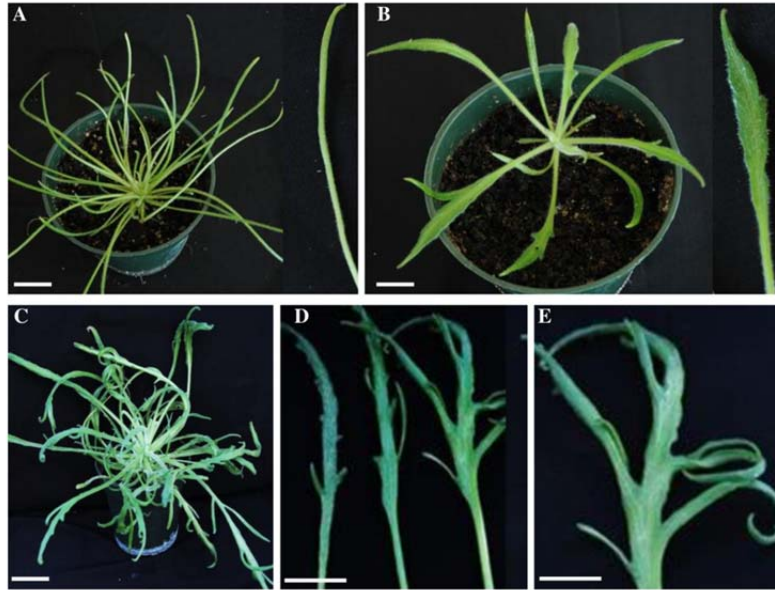

**Figure 2.** *NsWOX9-antisense* partially rescued *lam1* mutant phenotype.

(A) Phenotype of *lam1* mutant transformed with *35S::GUS* as control at three weeks of age. Inset on the right is detached leaf close up.  
(B) Partially complemented *lam1* phenotype transformed with *35S::NsWOX9-antisense* construct at three weeks, the inset is close up of a partially complemented leaf blade. Inset on the right is detached leaf close up.  
(C) Partially complemented *lam1* phenotype transformed with *35S::NsWOX9-antisense* construct at seven weeks.  
(D) Representative individual leaves from *35S::NsWOX9-antisense/lam1* plants.  
(E) A magnified view of a leaf in (D). Note the branching and curling of leaves especially in older *35S::NsWOX9-antisense/lam1* plants.  
Scale bars: A-D, 5 cm, E, 1.5 cm.

211 Transverse sections through the leaf blades showed that the *lam1* leaves had vestigial  
212 blade strips at the position of wild type blades (Figure 3F), but these strips were  
213 completely absent and blades became fully radialized in *NsWOX9* overexpressing *lam1*  
214 lines (Figure 3G). In *NsWOX9-antisense lam1* lines, on the other hand, distinct blade  
215 outgrowth was apparent but the nascent blades were not fully expanded compared to the  
216 wild type leaves (Figure 3E and 3H), confirming that blade development in the *NsWOX9-*  
217 *antisense* plants initiated more effectively than in the *lam1* plants but was not completed.  
218 Taken together, these results indicate that *WOX9* functions oppose those of *STF/LAM1* to  
219 negatively regulate leaf blade outgrowth in two unrelated eudicot species *M. truncatula*  
220 and *N. sylvestris*.

221

## 222 ***WOX9* overexpression severely affects leaf architecture**

223 To further examine the effect of *WOX9* in leaf blade outgrowth, we introduced  
224 *35S::MtWOX9-1*, *35S::MtWOX9-2* and *35S::NsWOX9* into wild type (WT) *N. sylvestris*.  
225 Analysis of over 20 independent transgenic lines for each construct revealed that all  
226 transgenic lines displayed an array of leaf phenotypes that can generally be grouped into

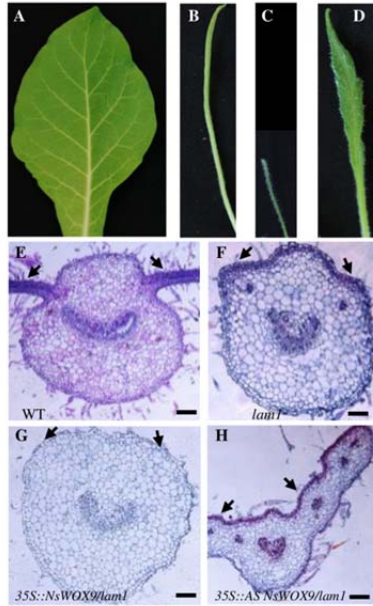

**Figure 3.** Transverse section of the leaf blade showing enhancement of the *lam1* blade by *35S::NsWOX9* and partial complementation by *35S::NsWOX9-antisense*.

(A) *N. sylvestris* WT leaf blade.

(B) Leaf blade of untransformed *lam1* mutant control.

(C) Leaf blade of *lam1* transformed with *35S::NsWOX9*.

(D) Partially complemented leaf blade of *lam1* transformed with *35S::NsWOX9-antisense*.

(E) Transverse section of *N. sylvestris* WT leaf blade.

(F) Transverse section of untransformed *lam1* mutant leaf blade.

(G) Transverse sections of *lam1* leaf blade transformed with *35S::NsWOX9* showing radialized blade.

(H) Transverse sections of *lam1* leaf blade transformed with *35S::NsWOX9-antisense* showing blade outgrowth. Arrows indicate blade tissue in (E) and (H), vestigial blade stripes in (F) and position of blade in (G). Scale bars: 50 μm.

227 severe and mild based on the phenotype strength. The wild type *N. sylvestris* leaf blade is  
228 a well-expanded flat lamina with smooth margin and distinctive pinnate venation pattern  
229 (Figure 4A). In plants with the severe phenotype *WOX9* overexpression completely  
230 disrupted this pattern resulting in highly distorted leaf forms. These include narrow and  
231 downward curling blades, deep margin serrations, disorganized venation patterns, uneven  
232 blade surfaces, as well as retarded plant growth with 2 to 5 tillers and additional leaves  
233 leading to a bushy appearance until stem elongation at a later developmental stage  
234 (Figures 4B, 4D, 4E, 4G; Supplemental Figure 4). While most overexpressing plants  
235 showed this strong phenotype, some exhibited a mild phenotype where the blade margin,  
236 shape and venation patterns were largely intact but with puckered and uneven blade  
237 surfaces (Figures 4C and 4F; Supplemental Figure 4). *MtWOX9-1* overexpression in *M.*  
238 *truncatula* also produced downward curling and narrower leaves similar to that seen in *N.*  
239 *sylvestris* (Supplemental Figure 5), albeit more mild, with an insignificant effect on  
240 tillering. These *WOX9* ectopic expression phenotypes in wild type and in *stf* and *lam1*  
241 mutants suggest that *WOX9* could be a negative regulator of leaf blade outgrowth  
242 antagonizing the function of *STF/LAMI*.  
243 **Deleting *NsWOX9* using multiplex gRNA CRISPR/Cas9 genome editing in *N.***  
244 ***sylvestris* alters blade symmetry and expansion**

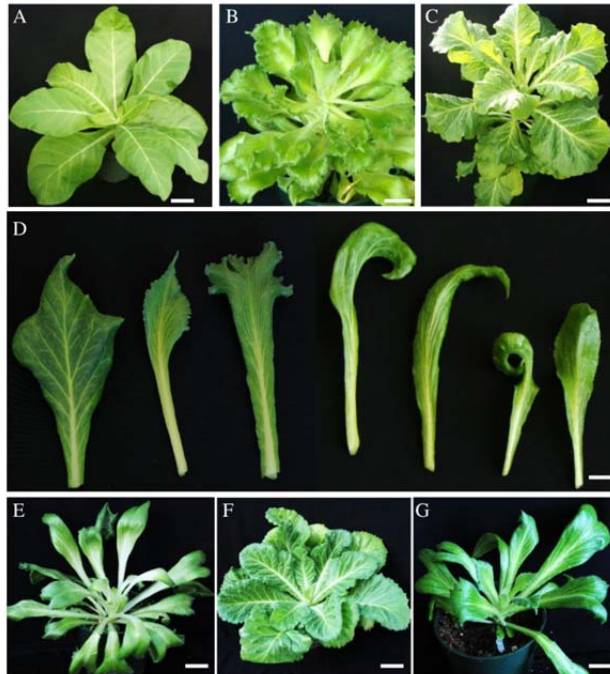

**Figure 4.** *WOX9* ectopic expression in WT *N. sylvestris* alters leaf architecture.

(A) WT *N. sylvestris* control plant at 7 weeks.  
(B) Phenotype of *35S::MtWOX9-1/WT* (severe phenotype) at 7 weeks after regeneration.  
(C) Phenotype of *35S::MtWOX9-1/WT* (mild-phenotype) at 7 weeks after regeneration.  
(D) Phenotypes of different individual representative leaves from different *35S::MtWOX9-1/WT* plants showing severe phenotypes at variable stages.  
(E) Phenotype of *35S::MtWOX9-2/WT* (severe phenotype) at early growth stage.  
(F) Phenotype of *35S::MtWOX9-2/WT* (mild) at early growth stage.  
(G) Phenotype of *35S::NsWOX9/WT* (severe) at early growth stage. Scale bars: A-C and E-G, 10 cm, D, 3 cm.

245 To gain insight into the function of the endogenous *WOX9* gene in wild type plants, we  
246 disrupted *NsWOX9* in *N. sylvestris* using CRISPR/Cas9 genome editing technology. We  
247 constructed an *NsWOX9*-multiplex gRNA-CRISPR/Cas9 vector containing three guide  
248 RNAs; gRNA1, gRNA2 and gRNA3 (Figure 5A), and introduced this construct into *N.*  
249 *sylvestris*. A total of 24 transgenic lines were generated and examined for mutations at  
250 the targeted regions. Sixteen putative mutant lines were identified by PCR amplification  
251 of the target regions using specific primers, and Sanger sequencing, indicating a 67%  
252 overall mutagenesis efficiency. Out of these sixteen putative mutants, five representative  
253 lines were selected for further characterization of their mutant phenotypes (Figure 5B).  
254 Target site sequence analysis of the five *NsWOX9*-CRISPR-mutants labeled here as  
255 *NsWOX9-1*, *NsWOX9-2*, *NsWOX9-13*, *NsWOX9-18* and *NsWOX9-22* using SeqMan Pro  
256 15.0.1 (DNASTAR software) revealed five different patterns of deletions ranging from  
257 14 to 183 bp (Figure 5B). *NsWOX9-1* and *NsWOX9-13* had identical 14 bp deletions in  
258 gRNA3. *NsWOX9-2* showed two deletion events at gRNA2 and gRNA3 with 7 and 21  
259 bp deletions, respectively. *NsWOX9-22* showed a 73 bp deletion spanning the upstream

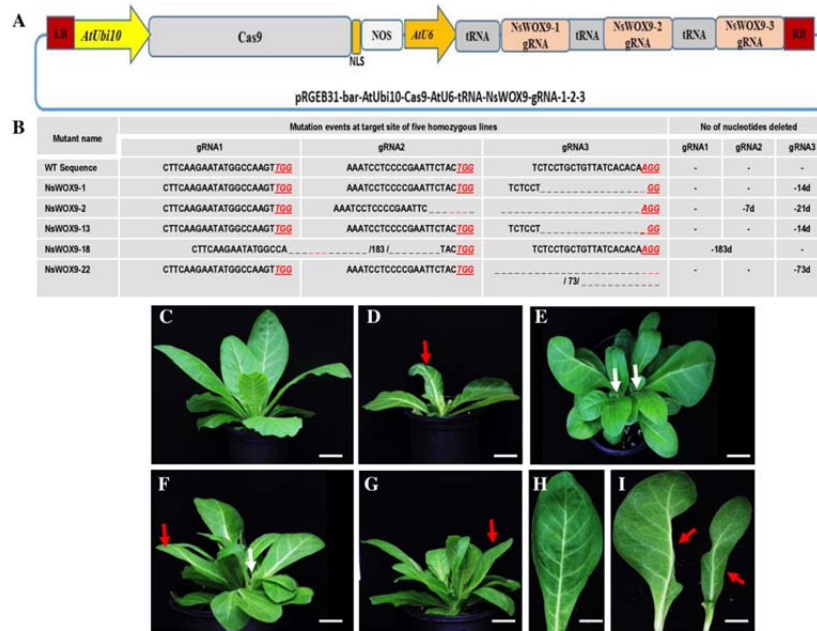

**Figure 5.** Knock out of *NsWOX9* with multiplex *gRNA-CRISPR/Cas9* in *N. sylvestris* alters leaf architecture. (A) Schematic representation of the three guide RNAs *NsWOX9*-gRNA1, 2 and 3 inserted in pRGEB31-bar-AtUbi10-AtU6-tRNA-gRNA vector. (B) Mutation events detected at the corresponding target sites of gRNA1, gRNA2 and gRNA3 in five independent CRISPR/Cas lines (*NsWOX9*-1, 2, 13, 18 & 22). (C-I) Phenotype of CRISPR/Cas9 edited plants and leaves; WT control (C), edited *NsWOX9*-13 mutant (D), edited *NsWOX9*-22 mutant (E), edited *NsWOX9*-18 mutant (F), edited *NsWOX9*-2 mutant (G), control WT leaf blade (H), representative individual leaf blades from edited plants; left, half blade deleted (*NsWOX9*-22), and right, narrow and asymmetric blade (*NsWOX9*-2). Red arrows point to blade defects, white arrows show multiple shoots. Scale bars: A-G, 5 cm, H and I, 2.5 cm.

260 and downstream region of gRNA3, while the largest deletion was detected in line  
 261 *NsWOX9*-18 where a 183 bp region between gRNA1 and gRNA2 was removed, which  
 262 included the PAM region of gRNA1 and extended to three nucleotides upstream of the  
 263 PAM of gRNA2 (Figure 5B). All of the five CRISPR-derived mutant lines displayed  
 264 malformed leaves including narrow and twisted blades, blade asymmetry, half leaf blade  
 265 deletion, rough blade surface, leaf shape distortions, multiple tillers, early flowering,  
 266 sterility and reduced fertility (Figures 5C to 5I). These results indicate that the negative  
 267 regulation of leaf blade expansion by *NsWOX9* is required for proper leaf blade  
 268 development in *N. sylvestris*.

269 ***MtWOX9-1* transcript is weakly expressed in leaves and directly repressed by STF in**  
 270 ***M. truncatula***

271 Reverse transcriptase quantitative PCR (RT-qPCR) analysis showed that expression of  
 272 *MtWOX9*-1 was relatively weak in most plant tissues, including leaves, while higher  
 273 levels of expression were detected in the shoot apex, flowers, pods and immature seeds,  
 274 with highest levels detected in developing seeds 10 days after anthesis, followed by

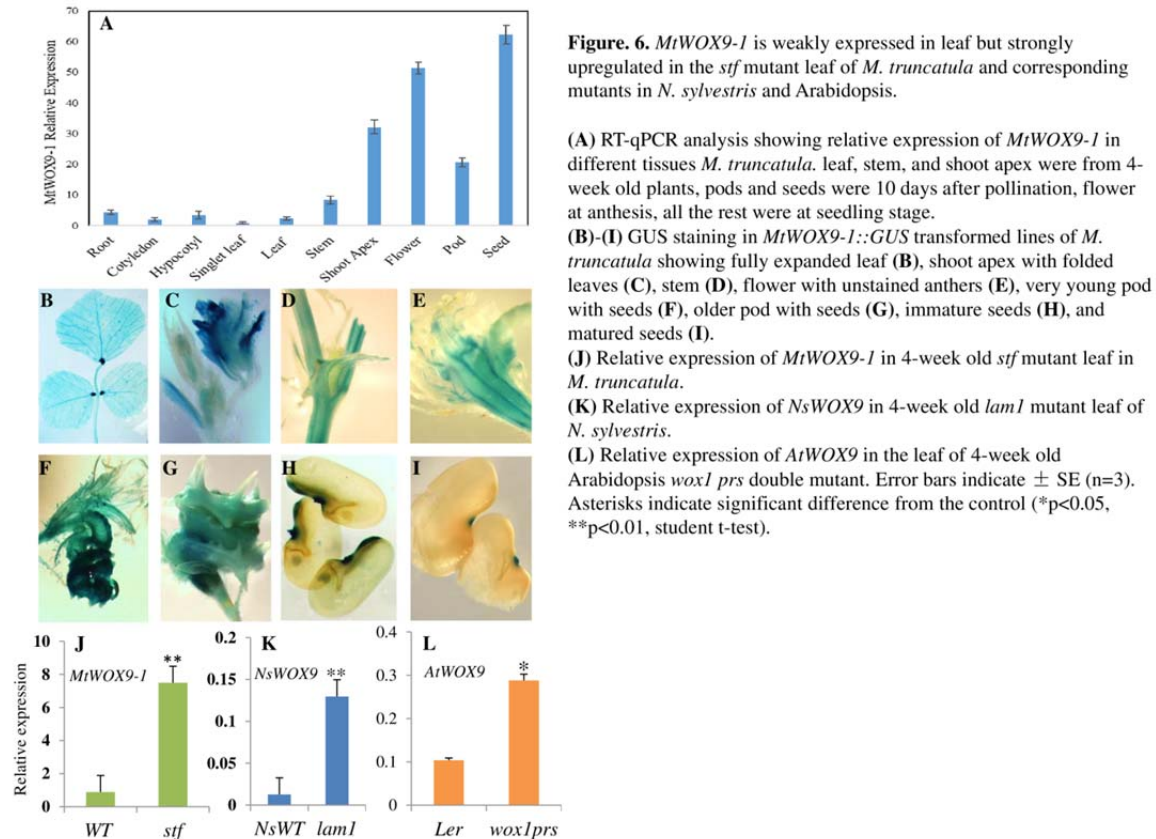

**Figure 6.** *MtWOX9-1* is weakly expressed in leaf but strongly upregulated in the *stf* mutant leaf of *M. truncatula* and corresponding mutants in *N. sylvestris* and *Arabidopsis*.

(A) RT-qPCR analysis showing relative expression of *MtWOX9-1* in different tissues *M. truncatula*. leaf, stem, and shoot apex were from 4-week old plants, pods and seeds were 10 days after pollination, flower at anthesis, all the rest were at seedling stage. (B)-(I) GUS staining in *MtWOX9-1::GUS* transformed lines of *M. truncatula* showing fully expanded leaf (B), shoot apex with folded leaves (C), stem (D), flower with unstained anthers (E), very young pod with seeds (F), older pod with seeds (G), immature seeds (H), and matured seeds (I). (J) Relative expression of *MtWOX9-1* in 4-week old *stf* mutant leaf in *M. truncatula*. (K) Relative expression of *NsWOX9* in 4-week old *lam1* mutant leaf of *N. sylvestris*. (L) Relative expression of *AtWOX9* in the leaf of 4-week old *Arabidopsis wox1 prs* double mutant. Error bars indicate  $\pm$  SE (n=3). Asterisks indicate significant difference from the control (\* $p$ <0.05, \*\* $p$ <0.01, student t-test).

275 expression in flowers (Figure 6A). Highest expression of *MtWOX9-2*, on the other hand,  
 276 was detected in the leaves followed by expression in shoot apices (Supplemental Figure  
 277 6). To examine the spatial distribution of expression, we fused a 3kb promoter region of  
 278 *MtWOX9-1* upstream of the translational start codon to the  $\beta$ -glucuronidase (*GUS*)  
 279 coding region, and transformed it into *Medicago* R108 leaf explants. GUS staining  
 280 analysis revealed that expression in the mature leaf was relatively weak with particularly  
 281 strong expression in the pulvinus at the base of the leaflets (Figure 6B). Strong  
 282 expression was detected in the shoot apex and immature leaves, followed by flowers and  
 283 stems (Figures 6C to 6E) but, no staining was detected in the anthers (Figure 6E). Very  
 284 strong expression of *MtWOX9-1* was detected in immature pods and seeds at early stages  
 285 of development (Figures 6F to 6I)). Interestingly, expression in the seed became  
 286 progressively restricted as the seed develops, and confined only to the hilum in the  
 287 mature seed (Figure 6I). These expression patterns suggest that the *MtWOX9-1* function  
 288 may be more important at the early stages of development, particularly during  
 289 embryogenesis and leaf morphogenesis.

290 To investigate the mechanistic relationship between *WOX9* and positive  
291 regulators of blade outgrowth, we examined the leaf blade expression levels of *WOX9* in  
292 *stf*, *lam1*, and *wox1 prs* mutants of *M. truncatula*, *N. sylvestris*, and *A. thaliana*  
293 respectively. RT-qPCR analyses showed that expression of *MtWOX9-1*, *NsWOX9*, and  
294 *AtWOX9* was upregulated by 2-4 fold in the leaves of *stf*, *lam1* and *wox1 prs* mutants  
295 compared to their respective wild type levels (Figures 6J to 6L), indicating that *WOX9*  
296 may be directly or indirectly repressed by the action of STF/LAM1/WOX1 in wild type  
297 leaves.

298 To examine whether *MtWOX9-1* is a direct target of STF, we performed a  
299 dexamethazone (DEX) induction experiment using the glucocorticoid (GR) system in the  
300 presence of the protein synthesis inhibitor, cycloheximide (CHX). Analysis was  
301 performed in 4-week old *stf* mutant plants transformed with the *35S::YFP-GR-STF*  
302 construct. The shoot apex and young leaves of the transgenic plants were treated with  
303 both DEX and CHX for 3 hours, and *MtWOX9-1* transcript accumulation was monitored  
304 by RT-qPCR in the leaves with and without the induction treatment. Our results showed  
305 that the expression of *MtWOX9-1* was reduced by approximately 60% in the DEX and  
306 CHX treated lines compared to the control CHX alone (Figure 7A). Since new protein  
307 synthesis is inhibited by CHX in the treated lines, this result suggests that *MtWOX9-1*  
308 may be directly repressed by STF. We repeated this experiment in *N. sylvestris* using  
309 *35S::YFP-GR-LAMI* fusion and found approximately 60% repression of *NsWOX9* upon  
310 *LAMI* induction by DEX plus CHX treatment (Figure 7B). However, in the reciprocal  
311 experiment, induction of *NsWOX9* expression had no significant effect on *LAMI*  
312 expression (Figure 7C), indicating that *NsWOX9* does not regulate *LAMI* transcription.

313 To determine if STF reduces *MtWOX9-1* transcript accumulation by directly  
314 targeting its promoter, we performed dual luciferase assay in Arabidopsis protoplasts  
315 using the Firefly-Renilla Dual-luciferase assay system (Promega). In the reporter  
316 construct, a 1kb promoter region of *MtWOX9-1* upstream of the translation start codon  
317 was fused to a mini 35S promoter driving the luciferase reporter gene (Figure 7D), while  
318 the effector constructs were made using either STF, or GUS as a negative control, both  
319 driven by the 35S promoter (Figure 7D). Consistent with the above results, co-expression  
320 of the STF effector in the protoplast almost fully abolished luciferase luminescence

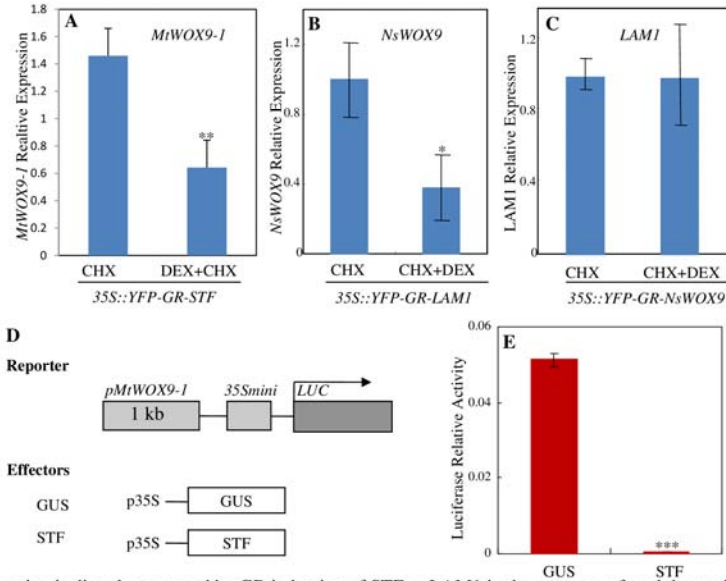

**Figure 7.** *WOX9* expression is directly repressed by GR induction of STF or LAM1 in the presence of cyclohexamide, and by STF in dual luciferase assay.

(A) Relative expression of *MtWOX9-1* in *35S::YFP-GR-STF* transformed *M. truncatula* lines with CHX or DEX+CHX treatment for 3 hours in 4-week old leaves.

(B) Relative expression of *NsWOX9* in 2 independently transformed *35S::YFP-GR-LAM1 N. sylvestris* lines with CHX alone, CHX+DEX or DEX alone treatments for 6 hours in 4-weeks old leaves.

(C) Relative expression of *LAM1* in *35S::YFP-GR-NsWOX9* transformed 2 independent *N. sylvestris* lines with CHX alone, CHX+DEX or DEX alone treatments for 6 hours in 4-weeks old young leaves. Relative gene expression was determined by RT-qPCR analyses.

(D) Schematic representation of reporter and effector constructs used in the dual luciferase assay.

(E) Relative expression of luciferase activity (luminescence) in the presence of *35S::STF* effector compared with the *35S::GUS* control in Arabidopsis protoplasts. Error bars indicate  $\pm$  SE (n=3). Asterisks indicate significant difference from the control (\* $p$ <0.05, \*\* $p$ <0.01, \*\*\* $p$ <0.001, student t-test).

321 compared to the GUS effector control (Figure 7E), indicating that this 1 kb region of the  
322 *MtWOX9-1* promoter is sufficient for STF-dependent repression of transcription.

323 To determine if STF indeed binds to the *MtWOX9-1* promoter *in vitro* and *in vivo*,  
324 we performed electrophoretic mobility shift assay (EMSA) using biotin labeled probes,  
325 and chromatin immunoprecipitation (ChIP) assay, using anti GFP antibody. We  
326 previously reported that STF binds preferentially to “AT-rich” DNA elements without a  
327 strong consensus sequence (Zhang et al., 2014). We screened six such selected regions in  
328 the 3 kb upstream region of the *MtWOX9-1* promoter, and found that the MBP-STF  
329 fusion protein was able to bind to three of them (Figure 8A). These STF-binding  
330 elements are located at -22, -226 and -491 bp upstream of the *MtWOX9-1* CDS while  
331 binding was not detected with the control maltose binding protein (MBP) alone (Figure  
332 8B). Each of these sites were significantly competed by addition of 50-fold excess of the  
333 respective unlabeled probes, indicating binding specificity. This shows that, at least *in*  
334 *vitro*, STF can directly bind to multiple sites within the 1 kb fragment of the *MtWOX9-1*  
335 promoter, consistent with the dual luciferase assay and GR induction experiments.

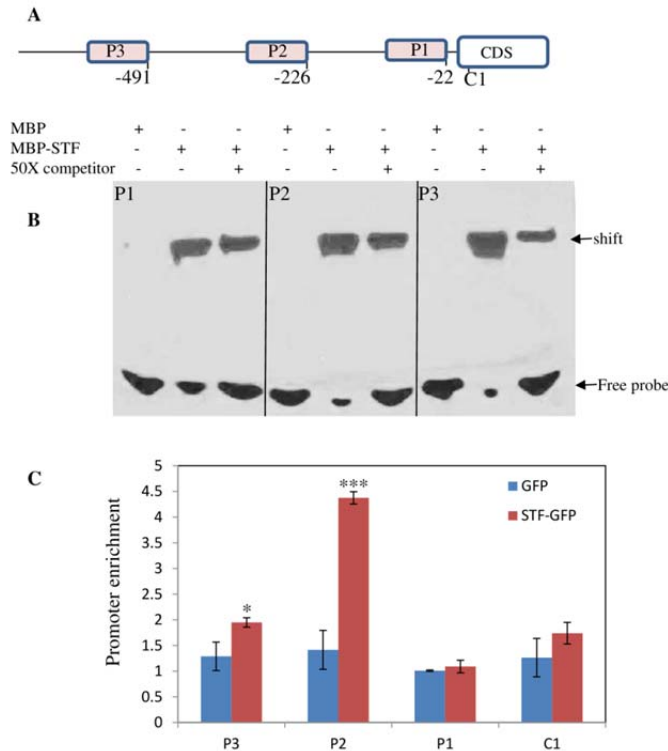

**Figure 8.** STF directly binds to the *MtWOX9-1* promoter in EMSA and ChIP assays.

(A) Schematic representation of the *MtWOX9-1* promoter and CDS regions tested for EMSA and ChIP assays. The 3 promoter regions tested are indicated as P1, P2 and P3 and the *MtWOX9-1* coding region as C1.

(B) EMSA showing MBP-STF bound to the biotin-labeled probe at P1, P2 and P3 promoter fragments but not the MBP control alone. Fifty-fold excess of unlabeled P1, P2 or P3 DNA was used to compete with the respective labeled probe (right lanes).

(C) *MtWOX9-1* promoter enrichment at P1, P2, P3 regions and CDS C1. Chromatin precipitated with anti-GFP antibody from *35S::STF-GFP* and *35S::GFP* control lines were compared. Purified DNA from the chromatin were used as templates for qPCR. Note that P2 is highly enriched in *35S::STF-GFP* samples. Error bars indicate  $\pm$  SE (n=3). Asterisks indicate statistical significance (\* $p < 0.05$ , \*\*\* $p < 0.001$ , student t-test).

336 To confirm that STF binds to the *MtWOX9-1* promoter in vivo, we performed  
 337 ChIP assays in leaves of *Arabidopsis wox1 prs* double mutant plants transformed with  
 338 *pMtWOX9-1::MtWOX9-1* construct. Protoplasts were isolated from these transgenic  
 339 plants and transformed with *35S::STF-GFP* fusion from which chromatin was isolated  
 340 for analysis. ChIP-qPCR analysis revealed that among the three tested promoter regions  
 341 (P1, P2 and P3), STF was highly enriched at P2 with significant enrichment also at P3  
 342 (Figure 8C). In contrast, no significant enrichment was detected at P1 or within the  
 343 *MtWOX9-1* coding region (C1), indicating that STF binds strongly at the P2 position and  
 344 to a limited extent at the P3 region *in planta*. Taken together, these results indicate that  
 345 STF directly binds to the proximal region of the *MtWOX9-1* promoter in *M. truncatula*,  
 346 and represses its activity, and that STF and WOX9 function antagonistically to regulate  
 347 leaf blade outgrowth.

348

349



## 350 Discussion

351 Plant specific WOX transcription factors regulate a variety of plant developmental  
352 programs from embryogenesis to shoot apical meristem maintenance and lateral organ  
353 development (Mayer et al., 1998; Schoof et al., 2000; Lohmann et al., 2001; Matsumoto  
354 and Okada, 2001; Nardmann et al., 2004; Sarkar, 2007; Breuninger et al., 2008; Shimizu  
355 et al., 2009; Vandenbussche et al., 2009; Ji et al., 2010; Tadege et al., 2011b; Nakata et  
356 al., 2012). WOX family members are also known for their promiscuous ability to  
357 substitute for each other's functions. For example, in Arabidopsis, WUS complements  
358 the *prx/wox3* and *wox5* mutants, which are defective in floral organ development and root  
359 apical meristem maintenance, respectively (Sarkar, 2007; Shimizu et al., 2009).  
360 Conversely, members of the WUS clade WOX genes (WOX1-WOX7), with the  
361 exception of WOX4, can substitute for WUS function in stem cell maintenance  
362 (Dolzblasz et al., 2016). Arabidopsis WUS and WOX1-WOX7 can also complement the  
363 *lam1* leaf blade mutant of *N. sylvestris* (Tadege et al., 2011b; Lin et al., 2013). Here we  
364 show that the *M. truncatula* and *N. sylvestris* WOX9 homologues, *MtWOX9-1*, *MtWOX9-*  
365 *2* and *NsWOX9* function antagonistically to *STF/LAMI* by negatively regulating blade  
366 outgrowth. Ectopic expression of these genes enhanced the *stf* and *lam1* leaf mutant  
367 phenotypes, and severely affected blade expansion and morphology in wild type *N.*  
368 *sylvestris* with a range of phenotypes (Figures 1 and 4). Conversely, reducing *NsWOX9*  
369 transcript levels in the *lam1* mutant with antisense technology partially complemented the  
370 mutant phenotype (Figure 2), indicating that *WOX9* antagonizes leaf blade outgrowth in  
371 the *STF/LAMI* pathway. However, complete knockout of *NsWOX9* by CRISPR/Cas9  
372 genome editing technology in the wild type background resulted in a range of leaf blade  
373 deformations including lack of bilateral symmetry, altered venation patterns, narrow  
374 blades and bushy shoots (Figure 5), indicating that *WOX9* function is required for proper  
375 leaf blade development.

376 In petunia and tomato, *WOX9* homologues are involved in inflorescence  
377 development and architecture (Lippman et al., 2008; Rebocho et al., 2008; Costanzo E,  
378 2014). Both the *evergreen* (*evg*) mutant in petunia (Rebocho et al., 2008) and *compound*  
379 *inflorescence* (*s*) in tomato (Lippman et al., 2008), which dramatically alter the wild type  
380 inflorescence architecture are caused by lesions in *WOX9* homologues. The *s* allele in

381 tomato results in a highly branched structure with hundreds of flowers, which increases  
382 fruit production and may have been selected by breeders ((Lippman et al., 2008). In the  
383 *evg* mutant of petunia, on the other hand, the inflorescence stem often fails to bifurcate  
384 after the formation of bracts and continues to grow as a single thickened stem without  
385 physical separation of the floral meristem (FM) and inflorescence meristem (IM), leading  
386 to a fasciated appearance (Rebocho et al., 2008). Unlike *s*, the *evg* FM also fails to  
387 produce floral organs suggesting that EVG is required for inflorescence bifurcation and  
388 floral organ identity, though *evg* mutants are indistinguishable from wild type during  
389 early vegetative growth (Rebocho et al., 2008). Thus, in tomato and petunia, *WOX9*  
390 homologues appear to have opposite effects specific to inflorescence development and  
391 architecture. However, both tomato and petunia have a cymose inflorescence pattern  
392 (determinate growth) and it is unclear whether these inflorescence-associated defects are  
393 specific to cymose or are also exhibited by racemose (indeterminate growth) and panicle  
394 (mixed inflorescence) inflorescences. At least in Arabidopsis (racemose inflorescence),  
395 the role of *WOX9* appears not to be restricted to inflorescence development, and in rice  
396 (mixed inflorescence), *WOX9* is involved in uniform tiller growth and development  
397 (Wang et al., 2014; Fang et al., 2020).

398 In Arabidopsis, *WOX9*, also called *STIMPY* (*STIP*), is required for meristem  
399 growth and maintenance and positively regulates *WUS* (Wu et al., 2005). *stip* mutants  
400 display arrested growth at an early stage of development but can be fully rescued by  
401 sucrose (Wu et al., 2005). *STIP*/*WOX9* is shown to mediate cytokinin signaling during  
402 shoot meristem establishment and, together with *WOX2* and *WOX8*, regulates zygote  
403 and embryo polarity patterning (Wu et al., 2007; Breuninger et al., 2008; Skylar et al.,  
404 2010; Ueda et al., 2011). *WOX9* homologues in other species are also reported to be  
405 involved in promoting somatic embryogenesis (Gambino et al., 2011; Tvorogova, 2019).  
406 In all of these examples, the function of *WOX9* appears to center on cell proliferation  
407 and/or meristematic competence for proper plant growth and development. Our  
408 observation of the effect of *WOX9* overexpression and knockout in Medicago and  
409 woodland tobacco leaf development is consistent with these findings, and may reflect a  
410 conserved molecular function in cell proliferation and differentiation during growth and  
411 development. For example, the Arabidopsis gain-of-function mutant *stip-D* displays

412 wavy leaf margins and increased number of axillary shoots leading to a bushy phenotype  
413 (Wu et al., 2005). A phenotype similar the wavy margins and bushy shoots seen in all  
414 *MtWOX9-1*, *MtWOX9-2* and *NsWOX9* overexpressing *N. sylvestris* transgenic lines  
415 (Figure 4), which suggests misregulation of cell proliferation in leaf primordia. The  
416 observation that both overexpression and knockout of *WOX9* in *N. sylvestris* led to  
417 narrow leaf and bushy shoot phenotypes suggests that *WOX9* may be involved in  
418 maintaining a balance between cell proliferation and differentiation, necessitating that  
419 *WOX9* transcripts be maintained at a required optimum. However, the mechanism of  
420 *WOX9* function and control of its steady state transcript levels during leaf  
421 morphogenesis and maturation is not well understood. We previously reported *AtWOX9*  
422 to be a transcriptional activator, based on its unique effects on the *lam1* mutant of *N.*  
423 *sylvestris* (Lin et al., 2013), which could provide insight into its molecular function.

424 The Arabidopsis *WOX* family has been divided into three clades based on  
425 phylogenetic analysis: the modern/*WUS* clade (*WUS*, *WOX1-7*), intermediate clade  
426 (*WOX8, 9, 11, 12*), and ancient clade (*WOX10, 13, 14*) (van der Graaff et al., 2009).  
427 This classification is largely consistent in other species as well (Zhang et al., 2010; Hao  
428 et al., 2019; Wu, 2020). The *WUS* clade members are characterized by an intact *WUS*  
429 box motif (Haecker et al., 2004; Lin et al., 2013), which is a transcriptional repression  
430 motif (Ikeda et al., 2009; Lin et al., 2013). Members of this group function primarily as  
431 transcriptional repressors, able to complement the *lam1* mutant phenotype (Lin et al.,  
432 2013), and are capable of substituting for *WUS* function in maintaining vegetative and  
433 floral meristems (Dolzblasz et al., 2016). The *WOX1* homologues *M. truncatula* *STF* and  
434 *N. sylvestris* *LAM1* belong to this clade and function as master regulators of leaf blade  
435 outgrowth through a transcriptional repression mechanism in association with the co-  
436 repressor *TOPLESS* (Tadege et al., 2011b; Lin, 2013; Lin et al., 2013; Zhang et al., 2014;  
437 Zhang et al., 2019). The intermediate and ancient clade members have partial or no *WUS*  
438 box, and do not have transcriptional repression activity in dual luciferase assays. As a  
439 result, they are unable to rescue the *lam1* mutant (Lin et al., 2013) nor substitute for *WUS*  
440 function (Dolzblasz et al., 2016). Among the intermediate and ancient clades, *AtWOX9*  
441 is unique in that it displays the strongest activation activity in dual luciferase assays, and  
442 strongly enhances the *lam1* mutant phenotype, affecting blade outgrowth in both medial-

443 lateral and proximal-distal axes (Lin et al., 2013), indicating that transcriptional  
444 activation activity modulated by AtWOX9 is antagonistic to LAM1 function. This is  
445 consistent with the observation that activation activity at the *STF* expression domain  
446 antagonizes *STF* function in blade outgrowth (Zhang et al., 2014; Zhang et al., 2019).

447 The results presented here demonstrated that *WOX9* transcript is upregulated in  
448 three leaf blade mutants; *stf* in *M. truncatula*, *lam1* in *N. sylvestris* and *wox1 prs* in  
449 Arabidopsis (Figures 6J to 6L), indicating that *WOX9* transcription may be suppressed by  
450 STF/LAM1/WOX1 in these species to allow blade outgrowth. Several lines of evidence  
451 including a GR inducible system in the presence of DEX and CHX, dual luciferase assay,  
452 EMSA, and ChIP confirmed that STF/LAM1 directly binds to the *MtWOX9-1* promoter  
453 to repress *WOX9* transcription (Figures 7 and 8), demonstrating that modern clade  
454 WOX1/STF/LAM1-mediated repression of intermediate clade *WOX9* is required for  
455 proper leaf blade outgrowth in eudicots. In Arabidopsis, *WOX9* functions upstream of  
456 *WUS* and is supposed to activate *WUS* to promote vegetative meristem growth (Wu et al.,  
457 2005), although it is unclear whether this activation is direct or indirect. *WOX9* is  
458 activated by cytokinin signaling (Skylar et al., 2010), and type-B ARRs directly activate  
459 *WUS* (Meng et al., 2017; Wang et al., 2017; Zhang et al., 2017; Zubo et al., 2017; Xie,  
460 2018), while *WUS* promotes cytokinin activity by repressing type-A ARRs (Leibfried et  
461 al., 2005). Thus, cytokinin signaling provides a potential connection between *WOX9* and  
462 *WUS* in Arabidopsis, but whether *WUS* can directly affect *WOX9* activity via negative  
463 or positive feedback loop is yet to be determined. Our work clearly demonstrates that in  
464 Medicago and woodland tobacco, the *WUS* clade member STF/LAM1 directly represses  
465 *MtWOX9-1* or *NsWOX9*, but significant *STF/LAM1* activation by *WOX9* was not  
466 detected (Figure 7C). Although *MtWOX9-1* may not activate *STF*, it is likely to activate  
467 other targets in leaf development. *WOX9* amino acid sequences from different species  
468 show a highly conserved acidic domain at the C-terminus (Supplemental Figure 1), which  
469 could mediate transcriptional activation. Thus, our current model is that STF represses  
470 the transcription of key targets at the adaxial-abaxial junction to promote cell  
471 proliferation, and these targets include *MtWOX9-1* and cell differentiation factors such as  
472 *AS2* (Zhang et al., 2014). *WOX9*, on the other hand, may negatively regulate blade  
473 outgrowth by directly activating targets independent of STF and/or by activating targets

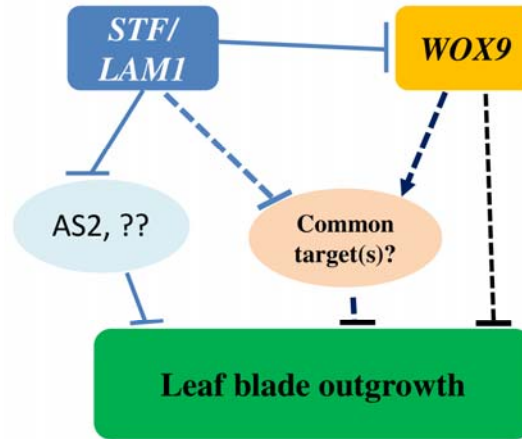

**Figure 9.** Schematic representation of hypothetical model for the regulation of leaf blade outgrowth by the interaction of STF/LAM1 and WOX9

STF/LAM1 directly represses *WOX9*, *AS2*, and other unidentified factors to promote leaf blade outgrowth. *WOX9*, on the other hand, negatively regulates leaf blade outgrowth by activating negative regulators of leaf growth and/or directly repressing blade outgrowth processes. The model proposes that STF/LAM1 and *WOX9* may have a common target(s) repressed by STF/LAM1 and activated by *WOX9* to balance cell proliferation with differentiation during leaf morphogenesis.

474 repressed by STF (Figure 9). The hypothesis that STF and *WOX9* may oppositely  
475 regulate common targets providing a critical balance between cell proliferation and  
476 differentiation during leaf morphogenesis, explains why *WOX9* ectopic expression  
477 enhances the *stf/lam1* mutant phenotype. Since both STF and WUS promote cell  
478 proliferation via a transcriptional repression mechanism in the leaf primordium and SAM,  
479 respectively, our findings suggest that direct control of *WOX9* activity by WUS may be  
480 required for SAM maintenance as well, uncovering a mechanistic framework for WOX  
481 modulated control of robust plant growth and developmental programs. It would be  
482 interesting to investigate if repression of the intermediate and ancient clade WOX  
483 transcriptional activators by modern clade WOX transcriptional repressors is a universal  
484 strategy exploited during the evolution of land plants and resulting in the complex  
485 morphological architecture of higher plants.  
486  
487

## 488 **Methods**

### 489 **Plant materials and growth conditions**

490 Plant materials used for this study including *Medicago truncatula* R108, *stf* mutant, and  
491 *Nicotiana sylvestris* (woodland tobacco) wild type and *lam1* mutant were grown in one  
492 gallon pots in a greenhouse under long-day (LD) conditions with 16/8 hours light/dark  
493 cycle at 23-27°C, and in growth room under long-day conditions of 16/8 hours light /dark  
494 cycle at 23-25°C, 70-80% relative humidity, and a light intensity of 150  $\mu\text{mol.m}^2$ .

### 495 **Samples collection, RNA extraction**

496 *M. truncatula* tissue samples (young leaf and shoot) were collected from 4 week old wild  
497 type and *stf* mutant plants. For GR induction, four weeks old plants of *p35S::YFP-GR-*  
498 *STF*, *p35S::YFP-GR-LAM1* and *p35S::YFP-GR-NsWOX9* transgenic lines were treated  
499 with mock, DEX (10 mM), and CHX (10 mM) for 3hrs in *M. truncatula* and 6 hrs in *N.*  
500 *sylvestris*, before leaf samples were collected. All leaf samples from wild type, mutants  
501 and transgenic lines were collected at appropriate times for analyses of gene expression  
502 patterns as indicated in figure legends. Collected samples were immediately snap-frozen  
503 in liquid nitrogen and stored at -80°C until processing.

504 Total RNA from shoot apex and young leaf of *M. truncatula* R108 (WT) and *stf* mutant,  
505 *N. sylvestris* (WT) and *lam1* mutant, Arabidopsis *Ler* (WT), *wox1/prs* mutant and  
506 *p35S::YFP-GR-STF*, *p35S::YFP-GR-LAM1* and *p35S::YFP-GR-NsWOX9* transgenic  
507 lines were isolated using TRIzol Reagent (Invitrogen) for cDNA synthesis.

### 508 **Real time PCR**

509 Expression patterns analyses were performed using quantitative real time PCR (RT-qPCR)  
510 and semi-quantitative PCR with specific forward and reverse primers (Supplemental table  
511 1). Reverse transcription (RT) was performed using RNA treated with DNase I  
512 (Invitrogen), an oligo (dT) primer, and SuperScript III reverse transcriptase (Invitrogen)  
513 according to the manufacturer's instruction. Quantitative RT-PCR assays were performed  
514 with three biological repeats and three technical replications of each experiment using  
515 SYBR Green real-time PCR Master Mix (Invitrogen). *M. truncatula*, Arabidopsis and *N.*  
516 *sylvestris* actin primers were used as expression standards. All specific forward and  
517 reverse primers used for gene cloning and expression and related molecular analyses in  
518 this study are listed in Supplemental Table 1.

519 **Gene isolation and transgene construction**

520 *MtWOX9-1* and *MtWOX9-2* genes were isolated from the *M. truncatula* genome by  
521 BLAST search using the *AtWOX9* sequence. Full-length *MtWOX9-1* & 2 coding  
522 sequences were amplified by RT-PCR using total RNA extracted from leaf samples. To  
523 generate transgenic plants of *M. truncatula*, the cDNA was sub-cloned into the  
524 pDONR207 entry vector (Invitrogen) by BP clonase reaction. The final constructs were  
525 produced by an LR clonase reaction between each of the entry vectors and pMDC32  
526 destination vector. The resulting plasmids were transferred into *Agrobacterium*  
527 *tumefaciens* strain *AGL1* and used to transform into *M. truncatula* R108 and *stf* mutant  
528 via agro-mediated-transformation using leaf explants as described (Tadege et al., 2011b).  
529 *N. sylvestris* WT and *lam1* mutant plants were transformed using *Agrobacterium*  
530 *tumefaciens*, *GV2260* strain by leaf disc inoculation method as previously described  
531 (Tadege et al., 2011b). Antisense of *N. sylvestris* (*NsWOX9-anti*) construct was made  
532 using the Gateway system (Invitrogen). Briefly, *NsWOX9-anti-F* and *NsWOX9-anti-R*  
533 primers were designed by reverse attachment attb2 and attb1 to the primers for  
534 amplification of the full-length CDS sequence from start and stop codon of the gene.  
535 Using such primers, *NsWOX9* was amplified from *NsWOX9-cDNA* and cloned into  
536 pDONR207 entry vector (Invitrogen) by BP clonase reaction. Then, the construct was  
537 transferred into destination vector pMDC32 by an LR clonase reaction. All generated  
538 transgenic lines were confirmed by PCR using specific primers, and reduced expression  
539 lines were identified by RT-PCR.

540 **Multiplex gRNA-CRISPR/Cas9 construction**

541 To generate the multiplex gRNA-CRISPR/Cas9 *NsWOX9* construct, we designed three  
542 multiplex gRNAs targeting multiple sites of exon 2 (gRNA1-  
543 CTTCAAGAATATGGCCA AGT; gRNA2-CTTCAAGAATATGGCCAAGT and  
544 gRNA3-TCTCCTGCTGTTATCA CACA) at the upstream of PAM (TGG, TGG, and  
545 AGG) sites, respectively, using the web-based tool CRISPR-P ([http://cbi.hzau.edu.cn/cgi-](http://cbi.hzau.edu.cn/cgi-bin/CRISPR)  
546 bin/CRISPR) (Lei, 2014). All designed gRNAs were inserted between tRNA and gRNA  
547 scaffolds and clustered in tandem using the Golden Gate assembly method (Engler, 2008).  
548 The pGTR plasmid, which contains a tRNA-gRNA fragment, was used as a template to  
549 synthesize polycistronic tRNA-gRNA (PTG) (Xie, 2015). The overlapping PCR products

550 were separated and purified by the Spin Column PCR Product Purification Kit (Wizard  
551 SV Gel and PCR Clean-Up System) following manufacturer's instruction (Promega, WI).  
552 Then, the chain of multiplex tRNA-gRNA with three *NsWOX9*-spacers was inserted into  
553 an optimized vector with AtU6-tRNA-gRNAs-AtUbi10-Cas9-pRGEB31-bar backbone  
554 by digestion and ligation using *Fok I* (NEB) and *BsaI* enzymes (Xie, 2015).

### 555 **CRISPR/Cas plant transformation and analysis**

556 The subsequent multiplex *NsWOX9*spacer-gRNA-CRISPR/Cas9 binary vector construct  
557 was transformed into *Agrobacterium* strain *GV2260*. First, transgenic lines were screened  
558 by PCR using genomic DNA and specific primers (PPT-F + PPT-R) of Barsta selection  
559 marker. Then, putative *nswox9-CRISPR* mutants were identified through amplification of  
560 the target region by PCR using extracted genomic DNA as a template with specific  
561 primers designed from the border of the target site. Amplified fragments of the mutated  
562 region were sub-cloned into pGEM-T easy plasmid by TA-Cloning and 10 colonies for  
563 each locus were subjected to Sanger sequencing. Reads were analyzed by aligning with  
564 the reference sequence using the SeqMan Pro 15.0.1 (DNASTAR software for life  
565 scientists) (<https://www.dnastar.com/quote-request/>).

### 566 **Electrophoretic mobility shift assay**

567 The *MtWOX9-1* promoter with 37, 30 and 32 bp oligonucleotides, corresponding to  
568 starting sites at -22, -226 and -491, respectively, upstream of the start codon were labeled  
569 using the Biotin 3' End DNA Labeling Kit according to the manufacturer's instructions  
570 (Thermo Scientific/Pierce). EMSA was performed with the Light Shift  
571 Chemiluminescent EMSA Kit (Thermo Scientific/Pierce). Unlabeled probes with a 50-  
572 fold higher concentration were used as competitors in each of the competing assays.  
573 Purified maltose binding protein (MBP) and MBP-STF were used in the EMSA as  
574 described (Zhang et al., 2014). Gel electrophoresis was performed on 10% native  
575 polyacrylamide gels. After blotting on a positively charged nylon membrane (Amersham),  
576 the DNA was crosslinked using a transilluminator equipped with 312 nm bulbs with the  
577 membrane face down for 15 min. The biotin-labeled DNA was detected by  
578 Chemiluminescence and exposed to X-ray film (Kodak). The probes and primers used in  
579 EMSA assay are listed in Supplemental Table 2.

### 580 **ChIP Assays**



581 ChIP assays were performed as described previously (Xiong et al., 2013; Chen et al.,  
582 2018). Protoplast extracted from 14-d-old *pMtWOX9-1:MtWOX9-1/wox1pr*s transgenic  
583 Arabidopsis leaves were transformed with 10 µg of 35S::STF-YFP using the  
584 polyethylene glycol-mediated transformation method. Protoplasts were cross-linked by 1%  
585 formaldehyde in W5 medium for 20 min and quenched with Glycine (0.2 M) for 5min.  
586 The protoplasts were then lysed, and the DNA was sheared on ice with sonication. The  
587 sheared chromatin was precleared by salmon sperm-sheared DNA/protein A agarose  
588 beads. Precleared chromatins were incubated with 5 µl of anti-GFP antibody (ab290)  
589 overnight at 4°C, after which Protein A agarose beads (40 µl) were added, and the  
590 samples were incubated at 4°C for 2 hrs. After reversing the crosslinks with Proteinase K  
591 at 65°C overnight, DNA was purified and analyzed by q-PCR amplification using  
592 specific primers. The input DNA and HA antibody-precipitated DNA were used as PCR  
593 templates for the positive and negative controls, respectively. Experiments were repeated  
594 three times. The primers used for the ChIP assays are listed in Supplemental Table 1

#### 595 **Dual luciferase assay**

596 For effector plasmids, the coding sequence of *STF* or GUS was cloned into pDONR207  
597 entry vector and then transferred into p2GW7 using the Gateway system (Invitrogen).  
598 Construction of the reporter *pMtWOX9-1-mini-35S-LUC* plasmid containing 1kb of the  
599 *MtWOX9-1* promoter was performed as previously described (Zhang et al., 2014).  
600 Transient expression assays were performed in Arabidopsis protoplasts as described  
601 (Asai et al., 2002). For normalization, 0.5 µg of plasmid pRLC was used as an internal  
602 control.

#### 603 **Histological analysis**

604 Leaf samples were fixed in formaldehyde for 48 hrs and dehydrated in an ethanol series  
605 (60, 70, 85 and 95%). Then, leaves were embedded in Paraplast (Sigma-Aldrich, St.  
606 Louis, MO) and tissue sections (15 µm thick) were cut with a Reichert- Jung 2050  
607 microtome. Specimens were mounted on slides and stained with Safranin O and Light  
608 Green as previously described (Tadege et al., 2011b). Images were captured with digital  
609 camera mounted on an Olympus BX-51 compound microscope.

#### 610 **Sequence alignment and phylogenetic tree construction**

611 Multiple protein sequence alignment was performed using BioEdit software and the  
612 ClustalW program (<http://www.mbio.ncsu.edu/bioedit/bioedit.html>). Species refer to At  
613 (*Arabidopsis thaliana*), Ns (*Nicotiana sylvestris*), Pc (*Phaseolus coccineus*), Gm (*Glycine*  
614 *max*), Vv (*Vitis vinifera*), Ph (*Petunia x hybrid*), Cs (*Cucumis sativus*), Sl (*Solanum*  
615 *lycopersicum*) and Ca (*Capsicum annuum*). A neighbor-joining phylogenetic tree was  
616 constructed using MEGA-X default settings with 1000 bootstrap replications  
617 (<http://www.megasoftware.net/>).

### 618 **Statistical Analysis**

619 For statistical analysis, Student's *t* test was used as specified in figure legends. Asterisks  
620 indicate statistical differences (\**P* < 0.05, \*\**P* < 0.01, \*\*\**p* < 0.001).

### 621 **Accession Numbers**

622 Sequence data from this article can be found in the NCBI (<http://www.ncbi.nlm.nih.gov/>)  
623 databases, *M. truncatula* Genome Database (<http://www.medicagogenome.org/>), or  
624 Phytozome (<https://phytozome.jgi.doe.gov/pz/portal.html>) under the following accession  
625 numbers: MtWOX9-1, Medtr2g015000; MtWOX9-2, Mt7go26130; AtWOX9,  
626 AT2G33880; AtWOX8, AT5G45980; NsWOX9, XM\_009794999; Ns-LAM1,  
627 AEL30893; MtSTF, JF276252; AtWOX1, AT3G18010; AtWOX3, AT2G28610;  
628 PcWOX9, ACL11801; GmWOX9, XP\_006594207; GmWOX9, XP\_003541514;  
629 VvWOX9, XP\_002273188; CaWOX9, XP\_016562050; CsWOX9, XP\_004134676;  
630 PhWOX9 (evergreen(EG)), ABO93066; PhWOX9 (SOEG); ABO93067; SlWOX9 (COI),  
631 NP\_001234072; SlWOX9 (COI) isoform, XP\_010315848.

632

### 633 **Supplemental Data**

634 **Supplemental Figure 1.** Amino acid sequence alignment of MtWOX9-1/2 and other  
635 related eudicot WOX9 sequences.

636 **Supplemental Figure 2.** Phylogenetic analysis of MtWOX9-1/2 and other related  
637 eudicots WOX9 protein sequences.

638 **Supplemental Figure 3.** Ectopic expression of *MtWOX9-1* enhances the *lam1* mutant  
639 phenotypes.

640 **Supplemental Figure 4.** Leaf phenotypes of *NsWOX9* overexpression in *N. sylvestris*.  
641 **Supplemental Figure 5.** Phenotype of *MtWOX9-1* overexpression in *M. truncatula*.  
642 **Supplemental Figure 6.** RT-qPCR analysis of *MtWOX9-2* expression in different tissues  
643 of *M. truncatula*.  
644 **Supplemental Table 1.** List of primers and gRNAs used in this study

645

#### 646 **Acknowledgements**

647 This work was supported by the National Science Foundation (NSF) grant IOS-1354422,  
648 Agriculture and Food Research Initiative Grant No. 2015-67014-22888 from the USDA  
649 National Institute of Food and Agriculture, and the Agricultural Experiment Station.  
650 Work in VT's laboratory at St Petersburg State University, Russia, was supported by the  
651 Russian Science Foundation project no. 16-16-10011 and by grant from the Russian  
652 Foundation for Basic Research no. 20-016-00124.

653

#### 654 **Author Contributions**

655 T.W.W., H.W., and M.T. designed the research. T.W.W., H.W., D.T., F.Z., M.B., H.A.,  
656 Y.L., and N.C. performed the experiments. T.W.W., H.W., F.Z., J.C., R.A., and M.T.  
657 analyzed the data. T.W.W., R.A., and M.T. wrote the manuscript.

658

#### 659 **Figure legends**

660

661 **Figure. 1.** Ectopic expression of *WOX9* enhances *stf* and *lam1* mutant phenotypes.

662

663 **(A)** Untransformed *M. truncatula* wild type (WT) (R108) plant.

664 **(B)** Phenotype of untransformed *stf* mutant.

665 **(C)** *stf* mutant transformed with *STF::MtWOX9-1*.

666 **(D)** Untransformed *N. sylvestris* WT plant.

667 **(E)** Phenotype of untransformed *lam1* mutant.

668 **(F)** *lam1* mutant transformed with *STF::MtWOX9-1*.

669 **(G)** *lam1* mutant transformed with *35S::MtWOX9-1*.

670 **(H)** *lam1* mutant transformed with *35S::MtWOX9-2*.

671 **(I)** *lam1* mutant transformed with *35S::NsWOX9*. Plants were 10-weeks (E and F) or 5-  
672 weeks old (all the rest). Scale bars: 10 cm.

673

674 **Figure. 2.** *NsWOX9-antisense* partially rescued *lam1* mutant phenotype.

675

676 **(A)** Phenotype of *lam1* mutant transformed with *35S::GUS* as control at three weeks of  
677 age. Inset on the right is detached leaf close up.

678 **(B)** Partially complemented *lam1* phenotype transformed with *35S::NsWOX9-antisense*  
679 construct at three weeks, the inset is close up of a partially complemented leaf blade.

680 Inset on the right is detached leaf close up.

681 **(C)** Partially complemented *lam1* phenotype transformed with *35S::NsWOX9-antisense*  
682 construct at seven weeks.

683 **(D)** Representative individual leaves from *35S::NsWOX9-antisense/lam1* plants.

684 **(E)** A magnified view of a leaf in **(D)**. Note the branching and curling of leaves  
685 especially in older *35S::NsWOX9-antisense/lam1* plants. Scale bars: A-D, 5 cm, E, 1.5  
686 cm.

687

688 **Figure. 3.** Transverse section of the leaf blade showing enhancement of the *lam1* blade  
689 by *35S::NsWOX9* and partial complementation by *35S::NsWOX9-antisense*.

690

691 **(A)** *N. sylvestris* WT leaf blade.

692 **(B)** Leaf blade of untransformed *lam1* mutant control.

693 **(C)** Leaf blade of *lam1* transformed with *35S::NsWOX9*.

694 **(D)** Partially complemented leaf blade of *lam1* transformed with *35S::NsWOX9-antisense*.

695 **(E)** Transverse section of *N. sylvestris* WT leaf blade.

696 **(F)** Transverse section of untransformed *lam1* mutant leaf blade.

697 **(G)** Transverse sections of *lam1* leaf blade transformed with *35S::NsWOX9* showing  
698 radialized blade.

699 **(H)** Transverse sections of *lam1* leaf blade transformed with *35S::NsWOX9-antisense*  
700 showing blade outgrowth. Arrows indicate blade tissue in **(E)** and **(H)**, vestigial blade

701 stripes in **(F)** and position of blade in **(G)**. Scale bars: 50  $\mu$ m.

702

703 **Figure 4.** *WOX9* ectopic expression in WT *N. sylvestris* alters leaf architecture.

704

705 (A) WT *N. sylvestris* control plant at 7 weeks.

706 (B) Phenotype of *35S::MtWOX9-1/WT* (severe phenotype) at 7 weeks after regeneration.

707 (C) Phenotype of *35S::MtWOX9-1/WT* (mild-phenotype) at 7 weeks after regeneration.

708 (D) Phenotypes of different individual representative leaves from different

709 *35S::MtWOX9-1/WT* plants showing severe phenotypes at variable stages.

710 (E) Phenotype of *35S::MtWOX9-2/WT* (severe phenotype) at early growth stage.

711 (F) Phenotype of *35S::MtWOX9-2/WT* (mild) at early growth stage.

712 (G) Phenotype of *35S::NsWOX9/WT* (severe) at early growth stage. Scale bars: A-C and

713 E-G, 10 cm, D, 3 cm.

714

715 **Figure 5.** Knock out of *NsWOX9* with multiplex *gRNA-CRISPR/Cas9* in *N. sylvestris*

716 alters leaf architecture.

717

718 (A) Schematic representation of the three guide RNAs *NsWOX9*-gRNA1, 2 and 3

719 inserted in pRGEB31-bar-AtUbi10-AtU6-tRNA-gRNA vector.

720 (B) Mutation events detected at the corresponding target sites of gRNA1, gRNA2 and

721 gRNA3) in five independent CRISPR/Cas lines (*NsWOX9-1, 2, 13, 18 & 22*).

722 (C-I) Phenotype of CRISPR/Cas9 edited plants and leaves; WT control (C), edited

723 *NsWOX9-13* mutant (D), edited *NsWOX9-22* mutant (E), edited *NsWOX9-18* mutant (F),

724 edited *NsWOX9-2* mutant (G), control WT leaf blade (H), representative individual leaf

725 blades from edited plants; left, half blade deleted (*NsWOX9-22*), and right, narrow and

726 asymmetric blade (*NsWOX9-2*). Red arrows point to blade defects, white arrows show

727 multiple shoots. Scale bars: A-G, 5 cm, H and I, 2.5 cm.

728

729 **Figure 6.** *MtWOX9-1* is weakly expressed in leaf but strongly upregulated in the *stf*

730 mutant leaf of *M. truncatula* and corresponding mutants in *N. sylvestris* and *Arabidopsis*.

731

732 **(A)** RT-qPCR analysis showing relative expression of *MtWOX9-1* in different tissues *M.*  
733 *truncatula*. leaf, stem, and shoot apex were from 4-week old plants, pods and seeds were  
734 10 days after pollination, flower at anthesis, all the rest were at seedling stage.

735 **(B)-(I)** GUS staining in *MtWOX9-1::GUS* transformed lines of *M. truncatula* showing  
736 fully expanded leaf **(B)**, shoot apex with folded leaves **(C)**, stem **(D)**, flower with  
737 unstained anthers **(E)**, very young pod with seeds **(F)**, older pod with seeds **(G)**,  
738 immature seeds **(H)**, and matured seeds **(I)**.

739 **(J)** Relative expression of *MtWOX9-1* in 4-week old *stf* mutant leaf in *M. truncatula*.

740 **(K)** Relative expression of *NsWOX9* in 4-week old *lam1* mutant leaf of *N. sylvestris*.

741 **(L)** Relative expression of *AtWOX9* in the leaf of 4-week old Arabidopsis *wox1 prs*  
742 double mutant. Error bars indicate  $\pm$  SE (n=3). Asterisks indicate significant difference  
743 from the control (\*p<0.05, \*\*p<0.01, student t-test).

744

745

746 **Figure 7.** *WOX9* expression is directly repressed by GR induction of STF or LAM1 in  
747 the presence of cyclohexamide, and by STF in dual luciferase assay.

748

749 **(A)** Relative expression of *MtWOX9-1* in *35S::YFP-GR-STF* transformed *M. truncatula*  
750 lines with CHX or DEX+CHX treatment for 3 hours in 4-week old leaves.

751 **(B)** Relative expression of *NsWOX9* in 2 independently transformed *35S::YFP-GR-LAMI*  
752 *N. sylvestris* lines with CHX alone, CHX+DEX or DEX alone treatments for 6 hours in  
753 4-weeks old leaves.

754 **(C)** Relative expression of *LAMI* in *35S-YFP-GR-NsWOX9* transformed 2 independent *N.*  
755 *sylvestris* lines with CHX alone, CHX+DEX or DEX alone treatments for 6 hours in 4-  
756 weeks old young leaves. Relative gene expression was determined by RT-qPCR analyses.

757 **(D)** Schematic representation of reporter and effector constructs used in the dual  
758 luciferase assay.

759 **(E)** Relative expression of luciferase activity (luminescence) in the presence of *35S::STF*  
760 effector compared with the *35S::GUS* control in Arabidopsis protoplasts. Error bars  
761 indicate  $\pm$ SE (n=3). Asterisks indicate significant difference from the control (\*p<0.05,  
762 \*\*p<0.01, \*\*\*p<0.001, student t-test).

763

764

765 **Figure 8.** STF directly binds to the *MtWOX9-1* promoter in EMSA and ChIP assays.

766

767 (A) Schematic representation of the *MtWOX9-1* promoter and CDS regions tested for  
768 EMSA and ChIP assays. The 3 promoter regions tested are indicated as P1, P2 and P3  
769 and the *MtWOX9-1* coding region as C1.

770 (B) EMSA showing MBP-STF bound to the biotin-labeled probe at P1, P2 and P3  
771 promoter fragments but not the MBP control alone. Fifty-fold excess of unlabeled P1, P2  
772 or P3 DNA was used to compete with the respective labeled probe (right lanes).

773 (C) *MtWOX9-1* promoter enrichment at P1, P2, P3 regions and CDS C1. Chromatin  
774 precipitated with anti-GFP antibody from *35S::STF-GFP* and *35S::GFP* control lines  
775 were compared. Purified DNA from the chromatin were used as templates for qPCR.  
776 Note that P2 is highly enriched in *35S::STF-GFP* samples. Error bars indicate  $\pm$ SE (n=3).  
777 Asterisks indicate statistical significance (\*p<0.05, \*\*\*p<0.001, student t-test).

778

779

780 **Figure 9.** Schematic representation of hypothetical model for the regulation of leaf blade  
781 outgrowth by the interaction of STF/LAM1 and WOX9

782

783 STF/LAM1 directly represses *WOX9*, *AS2*, and other unidentified factors to promote leaf  
784 blade outgrowth. *WOX9*, on the other hand, negatively regulates leaf blade outgrowth by  
785 activating negative regulators of leaf growth and/or directly repressing blade outgrowth  
786 processes. The model proposes that STF/LAM1 and *WOX9* may have a common target(s)  
787 repressed by STF/LAM1 and activated by *WOX9* to balance cell proliferation with  
788 differentiation during leaf morphogenesis.

789

790

## Parsed Citations

- Asai, T., Boller, T., Gomez-Gomez, L., Sheen, J., Ausubel, F.M., Plotnikova, J., Tena, G., Chiu, W.L., and Willmann, M.R. (2002).** MAP kinase signalling cascade in Arabidopsis innate immunity. *Nature (London, England) Nature* 415, 977-983.  
Pubmed: [Author and Title](#)  
Google Scholar: [Author Only Title Only Author and Title](#)
- Breuninger, H., Rikirsch, E., Hermann, M., Ueda, M., and Laux, T. (2008).** Differential expression of WOX genes mediates apical-basal axis formation in the Arabidopsis embryo. *Developmental cell* 14, 867-876.  
Pubmed: [Author and Title](#)  
Google Scholar: [Author Only Title Only Author and Title](#)
- Causier, B., Ashworth, M., Guo, W., and Davies, B. (2012).** The TOPLESS interactome: a framework for gene repression in Arabidopsis. *Plant Physiology* 158, 423-438.  
Pubmed: [Author and Title](#)  
Google Scholar: [Author Only Title Only Author and Title](#)
- Chen, N., Veerappan, V., Haggag, A., Miyong, K., and Allen, R.D.r.a.o.e. (2018).** HSI2/VAL1 Silences AGL15 to Regulate the Developmental Transition from Seed Maturation to Vegetative Growth in Arabidopsis. *Plant Cell* 30, 600-619.  
Pubmed: [Author and Title](#)  
Google Scholar: [Author Only Title Only Author and Title](#)
- Cho, S.-H., Yoo, S.-C., Zhang, H., Pandeya, D., Koh, H.-J., Hwang, J.-Y., Kim, G.-T., and Paek, N.-C. (2013).** The rice narrow leaf2 and narrow leaf3 loci encode WUSCHEL-related homeobox 3A (OsWOX3A) and function in leaf, spikelet, tiller and lateral root development. *The New phytologist* 198, 1071-1084.  
Pubmed: [Author and Title](#)  
Google Scholar: [Author Only Title Only Author and Title](#)
- Costanzo E, T.C., and Vandenbussche M. (2014).** The role of WOX genes in flower development. *Annals of Botany* 114, 1545-1553.  
Pubmed: [Author and Title](#)  
Google Scholar: [Author Only Title Only Author and Title](#)
- Daum, G., Medzihradzky, A., Suzaki, T., and Lohmann, J.U. (2014).** A mechanistic framework for noncell autonomous stem cell induction in Arabidopsis. *Proceedings of the National Academy of Sciences of the United States of America* 111, 14619-14624.  
Pubmed: [Author and Title](#)  
Google Scholar: [Author Only Title Only Author and Title](#)
- Deyhle, F., Sarkar, A.K., and Tucker, E.J. (2007).** WUSCHEL regulates cell differentiation during anther development. *Developmental Biology* 302, 154-159.  
Pubmed: [Author and Title](#)  
Google Scholar: [Author Only Title Only Author and Title](#)
- Dolzblasz, A, Barry, C., Brendan, D., Elena, C., Eric van der, G., Jinhui, C., Judith, N., Thomas, L., and Wolfgang, W. (2016).** Stem Cell Regulation by Arabidopsis WOX Genes. *Molecular plant* 9, 1028-1039.  
Pubmed: [Author and Title](#)  
Google Scholar: [Author Only Title Only Author and Title](#)
- Engler, C., Kandzia, R., & Marillonnet, S. . (2008).** A one pot, one step, precision cloning method with high throughput capability. . *PLoS ONE* 3, e3647.  
Pubmed: [Author and Title](#)  
Google Scholar: [Author Only Title Only Author and Title](#)
- Fang F, Y.S., Tang J, Bennett MJ, Liang W. (2020).** DWT1/DWL2 act together with OsPIP5K1 to regulate plant uniform growth in rice. *New Phytol.* 225, 1234-1246.  
Pubmed: [Author and Title](#)  
Google Scholar: [Author Only Title Only Author and Title](#)
- Gambino, G., Minuto, M., and Boccacci, P. (2011).** Characterization of expression dynamics of WOX homeodomain transcription factors during somatic embryogenesis in *Vitis vinifera*. *Journal of Experimental Botany* 62, 1089-1101.  
Pubmed: [Author and Title](#)  
Google Scholar: [Author Only Title Only Author and Title](#)
- Haecker, A, Gross-Hardt, R., Geiges, B., Sarkar, A, Breuninger, H., Herrmann, M., and Laux, T. (2004).** Expression dynamics of WOX genes mark cell fate decisions during early embryonic patterning in Arabidopsis thaliana. *Development* 131, 657-668.  
Pubmed: [Author and Title](#)  
Google Scholar: [Author Only Title Only Author and Title](#)
- Hao, Q., Shan, Z, Yang, Y., Zhang, L., and Zhou, X.-a. (2019).** Genome-Wide Analysis of the WOX Gene Family and Function Exploration of GmWOX18 in Soybean. *Plants* 8.  
Pubmed: [Author and Title](#)  
Google Scholar: [Author Only Title Only Author and Title](#)
- Hirakawa, Y., Kondo, Y., and Fukuda, H. (2010).** TDIF peptide signaling regulates vascular stem cell proliferation via the WOX4 homeobox gene in Arabidopsis. *The Plant cell* 22, 2618-2629.



Pubmed: [Author and Title](#)

Google Scholar: [Author Only Title Only Author and Title](#)

Hu C, ZY., Cui Y, Cheng K, Liang W, Wei Z, Zhu M, Yin H, Zeng L, Xiao Y, Lv M, Yi J, Hou S, He K, Li J, Gou X. (2018). A group of receptor kinases are essential for CLAVATA signalling to maintain stem cell homeostasis. *Nature Plants* 4, 205-211.

Pubmed: [Author and Title](#)

Google Scholar: [Author Only Title Only Author and Title](#)

Ikeda, M., Mitsuda, N., and Ohme-Takagi, M. (2009). Arabidopsis WUSCHEL is a bifunctional transcription factor that acts as a repressor in stem cell regulation and as an activator in floral patterning. *Plant Cell* 21, 3493-3505.

Pubmed: [Author and Title](#)

Google Scholar: [Author Only Title Only Author and Title](#)

Ishiwata, A., Akie, N., Hiroshi, N., Hiro-Yuki, H., Makio, K., Masahiko, M., Misa, O., Misuzu, N., Sae, S.-S., Takahiro, Y., Yusaku, N., and Yutaka, S. (2013). Two WUSCHEL-related homeobox Genes, narrow leaf2 and narrow leaf3, Control Leaf Width in Rice. *Plant & cell physiology* 54, 779-792.

Pubmed: [Author and Title](#)

Google Scholar: [Author Only Title Only Author and Title](#)

Iwakawa, H., Ueno, Y., Semiarti, E., Onouchi, H., Kojima, S., Tsukaya, H., Hasebe, M., Soma, T., Ikezaki, M., Machida, C., and Machida, Y. (2002). The ASYMMETRIC LEAVES2 gene of Arabidopsis thaliana, required for formation of a symmetric flat leaf lamina, encodes a member of a novel family of proteins characterized by cysteine repeats and a leucine zipper. *Plant & cell physiology* 43, 467-478.

Pubmed: [Author and Title](#)

Google Scholar: [Author Only Title Only Author and Title](#)

Ji, J., Strable, J., Shimizu, R., Koenig, D., Sinha, N., and Scanlon, M.J. (2010). WOX4 promotes procambial development. *Plant Physiology* 152, 1346-1356.

Pubmed: [Author and Title](#)

Google Scholar: [Author Only Title Only Author and Title](#)

Kerstetter, R.A., Bollman, K., Taylor, R.A., Bombles, K., and Poethig, R.S. (2001). KANADI regulates organ polarity in Arabidopsis. *Nature* 411, 706-709.

Pubmed: [Author and Title](#)

Google Scholar: [Author Only Title Only Author and Title](#)

Kieffer, M., Stern, Y., Cook, H., Clerici, E., Maulbetsch, C., Laux, T., and Davies, B. (2006). Analysis of the transcription factor WUSCHEL and its functional homologue in Antirrhinum reveals a potential mechanism for their roles in meristem maintenance. *Plant Cell* 18, 560-573.

Pubmed: [Author and Title](#)

Google Scholar: [Author Only Title Only Author and Title](#)

Laux, T., Mayer, K.F., Berger, J., and Jürgens, G. (1996). The WUSCHEL gene is required for shoot and floral meristem integrity in Arabidopsis. *Development* 122, 87-96.

Pubmed: [Author and Title](#)

Google Scholar: [Author Only Title Only Author and Title](#)

Lei, Y., Lu, L., Liu, H.Y., Li, S., Xing, F., & Chen, L.L. (2014). CRISPR-P: a web tool for synthetic single-guide RNA design of CRISPR-system in plants. *Molecular Plant* 7, 1494-1496.

Pubmed: [Author and Title](#)

Google Scholar: [Author Only Title Only Author and Title](#)

Leibfried, A, To, J.P., Busch, W., Stehling, S., Kehle, A, Demar, M., Kieber, J.J., and Lohmann, J.U. (2005). WUSCHEL controls meristem function by direct regulation of cytokinin-inducible response regulators. *Nature* 438, 1172-1175.

Pubmed: [Author and Title](#)

Google Scholar: [Author Only Title Only Author and Title](#)

Lin, H., Niu, L., McHale, N.A, Ohme-Takagi, M., Mysore, K.S., and Tadege, M. (2013). Evolutionarily conserved repressive activity of WOX proteins mediates leaf blade outgrowth and floral organ development in plants. *Proceedings of the National Academy of Sciences of the United States of America* 110, 366-371.

Pubmed: [Author and Title](#)

Google Scholar: [Author Only Title Only Author and Title](#)

Lin, H., Niu, L., Tadege, M. (2013). STENOFOLIA acts as a repressor in regulating leaf blade outgrowth. *Plant Signal Behav* 8, pii: e24464.

Pubmed: [Author and Title](#)

Google Scholar: [Author Only Title Only Author and Title](#)

Lippman, ZB., Cohen, O., and Alvarez, J.P. (2008). The Making of a Compound Inflorescence in Tomato and Related Nightshades. *PLoS Biology* 6, 2424-2435.

Pubmed: [Author and Title](#)

Google Scholar: [Author Only Title Only Author and Title](#)

Lohmann, J.U., Hong, R.L., Hobe, M., Busch, M.A, Parcy, F., Simon, R., and Weigel, D. (2001). A molecular link between stem cell regulation and floral patterning in Arabidopsis. *Cell* 105, 793-803.

Pubmed: [Author and Title](#)

Google Scholar: [Author Only Title Only Author and Title](#)

**Matsumoto, N., and Okada, K. (2001). A homeobox gene, PRESSED FLOWER, regulates lateral axis-dependent development of Arabidopsis flowers. Genes Dev. 15, 3355-3364.**

Pubmed: [Author and Title](#)

Google Scholar: [Author Only Title Only Author and Title](#)

**Mayer, K.F., Schoof, H., Haecker, A., Lenhard, M., Jürgens, G., and Laux, T. (1998). Role of WUSCHEL in regulating stem cell fate in the Arabidopsis shoot meristem. Cell 95, 805-815.**

Pubmed: [Author and Title](#)

Google Scholar: [Author Only Title Only Author and Title](#)

**McConnell, J.R., Emery, J., Eshed, Y., Bao, N., Bowman, J., and Barton, M.K. (2001). Role of PHABULOSA and PHAVOLUTA in determining radial patterning in shoots. Nature 411, 709-713.**

Pubmed: [Author and Title](#)

Google Scholar: [Author Only Title Only Author and Title](#)

**Meng, W., Cheng, Z., Sang, Y., Zhang, M., Rong, X., Wang, Z., Tang, Y., and Zhang, X. (2017). Type-B ARABIDOPSIS RESPONSE REGULATORS Specify the Shoot Stem Cell Niche by Dual Regulation of WUSCHEL. Plant Cell 29, 1357-1372.**

Pubmed: [Author and Title](#)

Google Scholar: [Author Only Title Only Author and Title](#)

**Meng, Y., Liu, H., Wang, H., Liu, Y., Zhu, B., Wang, Z., Hou, Y., Zhang, P., Wen, J., Yang, H., Mysore, K.S., Chen, J., Tadege, M., Niu, L., and Lin, H. (2019). HEADLESS, a WUSCHEL homolog, uncovers novel aspects of shoot meristem regulation and leaf blade development in Medicago truncatula. Journal of Experimental Botany 70, 149-163.**

Pubmed: [Author and Title](#)

Google Scholar: [Author Only Title Only Author and Title](#)

**Nakata, M., Matsumoto, N., Tsugeki, R., Rikirsch, E., Laux, T., and Okada, K. (2012). Roles of the Middle Domain-Specific WUSCHEL-RELATED HOMEBOX Genes in Early Development of Leaves in Arabidopsis. Plant Cell 24, 519-535.**

Pubmed: [Author and Title](#)

Google Scholar: [Author Only Title Only Author and Title](#)

**Nakata, M., Okada, K. (2012). The three-domain model: a new model for the early development of leaves in Arabidopsis thaliana. Plant Signal Behav 7, 1423-1427.**

Pubmed: [Author and Title](#)

Google Scholar: [Author Only Title Only Author and Title](#)

**Nardmann, J., Ji, J., Werr, W., and Scanlon, M.J. (2004). The maize duplicate genes narrow sheath1 and narrow sheath2 encode a conserved homeobox gene function in a lateral domain of shoot apical meristems. Development 131, 2827-2839.**

Pubmed: [Author and Title](#)

Google Scholar: [Author Only Title Only Author and Title](#)

**Park, S.O., Zheng, Z., Oppenheimer, D.G., and Hauser, B.A. (2005). The PRETTY FEW SEEDS2 gene encodes an Arabidopsis homeodomain protein that regulates ovule development. Development (Cambridge) 132, 841-849.**

Pubmed: [Author and Title](#)

Google Scholar: [Author Only Title Only Author and Title](#)

**Rebocho, A.B., Bliiek, M., Kusters, E., Castel, R., Procissi, A., Roobeek, I., Souer, E., and Koes, R. (2008). Role of EVERGREEN in the development of the cymose petunia inflorescence. Developmental Cell 15.**

Pubmed: [Author and Title](#)

Google Scholar: [Author Only Title Only Author and Title](#)

**Sarkar, A.K., Luijten, M., Miyashima, S., Lenhard, M., Hashimoto, T., Nakajima, K., Scheres, B., Heidstra, R., Laux, T. (2007). Conserved factors regulate signalling in Arabidopsis thaliana shoot and root stem cell organizers. Nature 446, 811-814.**

Pubmed: [Author and Title](#)

Google Scholar: [Author Only Title Only Author and Title](#)

**Sawa, S., Watanabe, K., Goto, K., Liu, Y. G., Shibata, D., Kanaya, E., Morita, E. H., Okada, K. (1999). FILAMENTOUS FLOWER, a meristem and organ identity gene of Arabidopsis, encodes a protein with a zinc finger and HMG-related domains. Genes Dev 13, 1079-1088.**

Pubmed: [Author and Title](#)

Google Scholar: [Author Only Title Only Author and Title](#)

**Schoof, H., Lenhard, M., Haecker, A., Mayer, K.F., Jürgens, G., and Laux, T. (2000). The stem cell population of Arabidopsis shoot meristems is maintained by a regulatory loop between the CLAVATA and WUSCHEL genes. Cell 100, 635-644.**

Pubmed: [Author and Title](#)

Google Scholar: [Author Only Title Only Author and Title](#)

**Shimizu, R., Ji, J., Kelsey, E., Ohtsu, K., Schnable, P.S., and Scanlon, M.J. (2009). Tissue specificity and evolution of meristematic WOX3 function. Plant Physiol. 149, 841-850.**

Pubmed: [Author and Title](#)

Google Scholar: [Author Only Title Only Author and Title](#)

**Siegfried, K.R., Eshed, Y., Baum, S. F., Otsuga, D., Drews, G. N., Bowman, J. L. (1999). Members of the YABBY gene family specify**

**abaxial cell fate in Arabidopsis.** *Development* 126, 4117-4128.

Pubmed: [Author and Title](#)

Google Scholar: [Author Only Title Only Author and Title](#)

**Skylar, A, Hong, F.X., Chory, J., Weigel, D., and Wu, X.L. (2010).** STIMPY mediates cytokinin signaling during shoot meristem establishment in Arabidopsis seedlings. *Development* 137, 541-549.

Pubmed: [Author and Title](#)

Google Scholar: [Author Only Title Only Author and Title](#)

**Snipes, S.A, Rodriguez, K., DeVries, A.E., Miyawaki, K.N., Perales, M., Xie, M., and Reddy, G.V. (2018).** Cytokinin stabilizes WUSCHEL by acting on the protein domains required for nuclear enrichment and transcription. *PLoS Genetics* 14, 1-23.

Pubmed: [Author and Title](#)

Google Scholar: [Author Only Title Only Author and Title](#)

**Somssich, M., Byoung II, J., Simon, R.r.s.u.-d.d., and Jackson, D.j.c.e. (2016).** CLAVATA-WUSCHEL signaling in the shoot meristem. *Development (09501991)* 143, 3238-3248.

Pubmed: [Author and Title](#)

Google Scholar: [Author Only Title Only Author and Title](#)

**Stuurman, J., Jaggi, F., and Kuhlemeier, C. (2002).** Shoot meristem maintenance is controlled by a GRAS-gene mediated signal from differentiating cells. *Genes Dev* 16, 2213-2218.

Pubmed: [Author and Title](#)

Google Scholar: [Author Only Title Only Author and Title](#)

**Tadege, M. (2016).** WOX3 in the scene: intimacy with hormones. *Journal of Experimental Botany* 67, 1605-1607.

Pubmed: [Author and Title](#)

Google Scholar: [Author Only Title Only Author and Title](#)

**Tadege, M., and Mysore, K.S. (2011).** Tnt1 retrotransposon tagging of STF in *Medicago truncatula* reveals tight coordination of metabolic, hormonal and developmental signals during leaf morphogenesis. *Mobile Genetic Elements (2159-2543)* 1, 301-303.

Pubmed: [Author and Title](#)

Google Scholar: [Author Only Title Only Author and Title](#)

**Tadege, M., Lin, H., Niu, L., and Mysore, K.S. (2011a).** Control of dicot leaf blade expansion by a WOX gene, STF. *Plant Signal Behav.* 6, 1861-1864.

Pubmed: [Author and Title](#)

Google Scholar: [Author Only Title Only Author and Title](#)

**Tadege, M., Chen, F., Murray, J., Wen, J., Ratet, P., Udvardi, M., Dixon, R., and Mysore, K. (2015).** Control of Vegetative to Reproductive Phase Transition Improves Biomass Yield and Simultaneously Reduces Lignin Content in *Medicago truncatula*. *BioEnergy Research* 8, 857-867.

Pubmed: [Author and Title](#)

Google Scholar: [Author Only Title Only Author and Title](#)

**Tadege, M., Lin, H., Bedair, M., Berbel, A, Wen, J., Rojas, C.M., Niu, L., Tang, Y., Sumner, L., Ratet, P., McHale, N.A., Madueño, F., and Mysore, K.S. (2011b).** STENOFOLIA Regulates Blade Outgrowth and Leaf Vascular Patterning in *Medicago truncatula* and *Nicotiana sylvestris*. *Plant Cell* 23, 2125-2142.

Pubmed: [Author and Title](#)

Google Scholar: [Author Only Title Only Author and Title](#)

**Tvorogova, V.E., Fedorova, Y.E., Potsenkovskaya, E.A, Kudriashov, A.A, Efremova, E.P., Kvitkovskaya, V.A, Wolabu, T.W., Zhang, F., Tadege, M., & Lutova, L.A . (2019).** The WUSCHEL-related homeobox transcription factor MtWOX9-1 stimulates somatic embryogenesis in *Medicago truncatula*. *Plant Cell, Tissue and Organ Culture* 3, 517-527.

Pubmed: [Author and Title](#)

Google Scholar: [Author Only Title Only Author and Title](#)

**Ueda, M., Zhang, Z.J., and Laux, T. (2011).** Transcriptional Activation of Arabidopsis Axis Patterning Genes WOX8/9 Links Zygote Polarity to Embryo Development. *Developmental cell* 20, 264-270.

Pubmed: [Author and Title](#)

Google Scholar: [Author Only Title Only Author and Title](#)

**van der Graaff, E., Laux, T., and Rensing, S.A (2009).** The WUS homeobox-containing (WOX) protein family. *Genome Biol.* 10, 248.

Pubmed: [Author and Title](#)

Google Scholar: [Author Only Title Only Author and Title](#)

**Vandenbussche, M., Horstman, A, Zethof, J., Koes, R., Rijpkema, A.S., and Gerats, T. (2009).** Differential recruitment of WOX transcription factors for lateral development and organ fusion in *Petunia* and *Arabidopsis*. *Plant cell* 21, 2269-2283.

Pubmed: [Author and Title](#)

Google Scholar: [Author Only Title Only Author and Title](#)

**Waites, R., Selvadurai, H.R.N., Oliver, I.R., and Hudson, A (1998).** The PHANTASTICA gene encodes a MYB transcription factor involved in growth and dorsoventrality of lateral organs in *antirrhinum*. *Cell* 93, 779-789.

Pubmed: [Author and Title](#)

Google Scholar: [Author Only Title Only Author and Title](#)

Wang, H., Niu, L., Fu, C., Meng, Y., Sang, D., Yin, P., Wu, J., Tang, Y., Lu, T., Wang, Z.Y., Tadege, M., Lin, H. (2017). Overexpression of the WOX gene STENOFOLIA improves biomass yield and sugar release in transgenic grasses and display altered cytokinin homeostasis. *PLoS Genet.* 13, e1006649.

Pubmed: [Author and Title](#)

Google Scholar: [Author Only Title Only Author and Title](#)

Wang H, X.Y., Hong L, Zhang X, Wang X, Zhang J, Ding Z, Meng Z, Wang ZY, Long R, Yang Q, Kong F, Han L, Zhou C. (2019). HEADLESS Regulates Auxin Response and Compound Leaf Morphogenesis in *Medicago truncatula*. *Front Plant Sci.* 10, 1024.

Pubmed: [Author and Title](#)

Google Scholar: [Author Only Title Only Author and Title](#)

Wang, J., Caihuan, T., Cui, Z., Bihai, S., Xiuwei, C., Tian-Qi, Z., Zhong, Z., Jia-Wei, W., and Yuling, J. (2017). Cytokinin Signaling Activates WUSCHEL Expression during Axillary Meristem Initiation. *Plant Cell* 29, 1373-1387.

Pubmed: [Author and Title](#)

Google Scholar: [Author Only Title Only Author and Title](#)

Wang, W., Li, G., Zhao, J., Chu, H., Lin, W., Zhang, D., Wang, Z., and Liang, W.w.s.e.c. (2014). DWARF TILLER1, a WUSCHEL-Related Homeobox Transcription Factor, Is Required for Tiller Growth in Rice. *PLoS Genetics* 10, 1-15.

Pubmed: [Author and Title](#)

Google Scholar: [Author Only Title Only Author and Title](#)

Wu, C.C.L., F.W. Kramer, E.M. (2020). Large-scale phylogenomic analysis suggests three ancient superclades of the WUSCHEL-RELATED HOMEBOX transcription factor family in plants. *PLoS One* 14, e0223521.

Pubmed: [Author and Title](#)

Google Scholar: [Author Only Title Only Author and Title](#)

Wu, X., Chory, J., and Weigel, D. (2007). Combinations of WOX activities regulate tissue proliferation during *Arabidopsis* embryonic development. *Developmental biology* 309, 306-316.

Pubmed: [Author and Title](#)

Google Scholar: [Author Only Title Only Author and Title](#)

Wu, X.L., Dabi, T., and Weigel, D. (2005). Requirement of homeobox gene STIMPY/WOX9 for *Arabidopsis* meristem growth and maintenance. *Current Biology* 15, 436-440.

Pubmed: [Author and Title](#)

Google Scholar: [Author Only Title Only Author and Title](#)

Xie, K., Minkenberg, B., & Yang, Y. . (2015). Boosting CRISPR/Cas9 multiplex editing capability with the endogenous tRNA-processing system. *Proceedings of the National Academy of Sciences, USA*, 112 (11), 3570–3575. *Proceedings of the National Academy of Sciences, USA*, 112, 3570-3575.

Pubmed: [Author and Title](#)

Google Scholar: [Author Only Title Only Author and Title](#)

Xie, M.C., H. Huang, L. O'Neil, RC. Shokhirev, MN. Ecker, JR. (2018). A B-ARR-mediated cytokinin transcriptional network directs hormone cross-regulation and shoot development. *Nat Commun.* 9, 1604.

Pubmed: [Author and Title](#)

Google Scholar: [Author Only Title Only Author and Title](#)

Xiong, Y., McCormack, M., Li, L., Hall, Q., Xiang, C., and Sheen, J. (2013). Glucose-TOR signalling reprograms the transcriptome and activates meristems. *Nature* 496, 181-186.

Pubmed: [Author and Title](#)

Google Scholar: [Author Only Title Only Author and Title](#)

Yadav, R.K., Perales, M., Gruel, J., Girke, T., Jonsson, H., and Reddy, G.V. (2011). WUSCHEL protein movement mediates stem cell homeostasis in the *Arabidopsis* shoot apex. *Genes & development* 25, 2025-2030.

Pubmed: [Author and Title](#)

Google Scholar: [Author Only Title Only Author and Title](#)

Yadav, R.K., Perales, M., Gruel, J., Ohno, C., Heisler, M., Girke, T., Jonsson, H., and Reddy, G.V. (2013). Plant stem cell maintenance involves direct transcriptional repression of differentiation program. *Molecular systems biology* 9, 654.

Pubmed: [Author and Title](#)

Google Scholar: [Author Only Title Only Author and Title](#)

Zhang, F., May, A., and Irish, V.F. (2017). Type-B ARABIDOPSIS RESPONSE REGULATORS Directly Activate WUSCHEL. *Trends in Plant Science* 22, 815-817.

Pubmed: [Author and Title](#)

Google Scholar: [Author Only Title Only Author and Title](#)

Zhang, F., Wang, Y., Li, G., and Tang, Y.K., EM. Tadege, M. (2014). STENOFOLIA Recruits TOPLESS to Repress ASYMMETRIC LEAVES2 at the Leaf Margin and Promote Leaf Blade Outgrowth in *Medicago truncatula*. *Plant Cell* 26, 650-664.

Pubmed: [Author and Title](#)

Google Scholar: [Author Only Title Only Author and Title](#)

Zhang, F., Wang, H., Kalve, S., Wolabu, T.W., Nakashima, J., Golz, J.F., and Tadege, M. (2019). Control of leaf blade outgrowth and floral organ development by LEUNIG, ANGUSTIFOLIA3 and WOX transcriptional regulators. *New Phytologist* 223, 2024-2038.

Pubmed: [Author and Title](#)

Google Scholar: [Author Only Title Only Author and Title](#)

**Zhang F, T.M. (2015). Repression of AS2 by WOX family transcription factors is required for leaf development in Medicago and Arabidopsis. Plant Signal Behav. 10, e993291.**

Pubmed: [Author and Title](#)

Google Scholar: [Author Only Title Only Author and Title](#)

**Zhang, X., Yin, J., Zhang, D., Zong, J., and Liu, J. (2010). Genome-Wide Analysis of WOX Gene Family in Rice, Sorghum, Maize, Arabidopsis and Poplar [electronic resource]. Journal of integrative plant biology 52, 1016-1026.**

Pubmed: [Author and Title](#)

Google Scholar: [Author Only Title Only Author and Title](#)

**Zhuang, L.-L., Ambrose, M., Rameau, C., Weng, L., Yang, J., Hu, X.-H., Luo, D., and Li, X. (2012). LATHYROIDES, Encoding a WUSCHEL-Related Homeobox1 Transcription Factor, Controls Organ Lateral Growth, and Regulates Tendril and Dorsal Petal Identities in Garden Pea (Pisum sativum L.). Molecular plant 5, 1333-1345.**

Pubmed: [Author and Title](#)

Google Scholar: [Author Only Title Only Author and Title](#)

**Zubo, Y.O., Yamburenko, M.V., Worthen, J.M., Street, I.H., Hill, K., Schaller, G.E., Blakley, I.C., Loraine, A.E., Franco-Zorrilla, J.M., Wenjing, Z., Raines, T., Kieber, J.J., and Solano, R. (2017). Cytokinin induces genome-wide binding of the type-B response regulator ARR10 to regulate growth and development in Arabidopsis. Proceedings of the National Academy of Sciences of the United States of America 114, E5995-E6004.**

Pubmed: [Author and Title](#)

Google Scholar: [Author Only Title Only Author and Title](#)
